# Supplementary material for: Influence of Aza-Glycine Substitution on the Internalization of Penetratin
Source: MDPI journal article supplement (doi:10.3390/pharmaceutics16040477), 2024-03-30
Supplement: s1 [file s1]

## Supplementary Materials

# Influence of aza-glycine substitution on the internalization of penetratin

Karima Tarchoun<sup>1,2</sup>, Dóra Soltész<sup>1,2</sup>, Viktor Farkas<sup>3</sup>, Ho-Jin Lee<sup>4,5</sup>, Ildikó Szabó<sup>6</sup>, Zoltán Bánóczy<sup>1,\*</sup>

<sup>1</sup>ELTE Eötvös Loránd University, Budapest, Hungary; Institute of Chemistry, Faculty of Science, Pázmány Péter sétány. 1/A, Budapest H-1117, Hungary

<sup>2</sup>Hevesy György PhD School of Chemistry, Institute of Chemistry, ELTE Eötvös Loránd University, Pázmány Péter sétány 1/A, H-1117 Budapest, Hungary

<sup>3</sup>HUN-REN-ELTE Protein Modeling Research Group, Institute of Chemistry, Eötvös Loránd University, Pázmány Péter sétány. 1/A, Budapest, Hungary

<sup>4</sup>Department of Natural Sciences, Southwest Tennessee Community College, Memphis, TN 38015, USA

<sup>5</sup>Division of Natural and Mathematics Sciences, LeMoyne-Owen College, Memphis, TN 38126, USA

<sup>6</sup>HUN-REN-ELTE Research Group of Peptide Chemistry, 1117 Budapest, Hungary

\* Correspondence: zoltan.banoczy@ttk.elte.hu

## 1. Materials

All amino acid derivatives, Fmoc protected amino acids, N, N'- diisopropylcarbodiimide (DIC), and Rink-amide MBHA resin were purchased from IRIS Biotech GmbH (Marktredwitz, Germany). 1,8- diazabicyclo[5.4.0]undec-7-ene (DBU), N,N-diisopropylethylamine (DIEA), ethanedithiol (EDT), 1, 1'-carbonyldiimidazole (CDI) and thioanisole were obtained from FLUKA (Buchs, Switzerland), while , 5-(N-Ethyl-N-isopropyl) amiloride (EIPA), Colchicine (COL), Sodium azide (NaN<sub>3</sub>), Deoxy-D-glucose (DOG), phenol, trifluoroacetic acid(TFA), Ethyl cyano(hydroxyimino)acetate (Oxyma Pure), 5(6)-carboxyfluorescein (Cf), and all other chemicals used for biological studies, were supplied from Sigma Aldrich (Budapest, Hungary) products. Methyl-beta-cyclodextrin (CyD), Fmoc-hydrazide and chlorpromazine (CPZ) were acquired from TCI chemicals. Solvents used for the synthesis and purification were obtained from Molar Chemicals Ltd (Budapest, Hungary).

### 1.1 RP-HPLC

All samples were dissolved in a small amount of eluant B (0.1% TFA in acetonitrile-water (80:20, v/v)) and injected into the analytical RP-HPLC. This was performed on Exformma (Exformma Technology (ASIA) Co., Ltd, Hong Kong, China) HPLC system. The column used was Hypersil Hypurity C18 column (4.6 mm × 150 mm, 5 μm, 190 Å), and linear gradient elution (0 min 0% B; 2 min 0% B; 22 min 90% B) was applied using eluent A (0.1% TFA in water), and eluant B at flow rate of 1 mL/min. The wavelength for the peaks detection is λ= 220 nm, for both analytical and preparative RP-HPLC. The crude samples were dissolved in eluant A and a semi-preparative Phenomenex Jupiter C18 column (250 × 10 mm I.D.) with 10 mm silica (300 Å pore size) (Torrance, CA, USA) was used for the purification. The flow rate was 4 mL/min, and linear gradient elution is applied.

## 1.2 Mass spectrometry

The determination of the molecular weight of peptides-conjugates, was performed by ESI-MS, using Bruker Amazon SL (Germany). The samples were prepared and dissolved in water-acetonitrile solution (50:50) containing 0.1% of formic acid. The injection of the samples was done directly through a syringe pump. Parameters: capillary voltage: 4 kV, nebulizer gas: 10 psi, dry gas: 4 L/min, heated capillary temperature: 250 °C.

## 1.3 Cell Culture

A-431 human skin squamous cancer cells (CRL-1555TM) were used for the in vitro analysis. The cells were cultured in Dulbecco's Modified Eagle Medium (DMEM) Containing 10% heat inactivated foetal calf serum (FCS), nonessential amino acids (NEAA), sodium pyruvate (1mM), L-Glutamine (2 mM), 1% nonessential amino acids and 1% penicillin-streptomycin (from 10,000 units penicillin and 10 mg/ml streptomycin). The cells were maintained in plastic tissue culture dishes under conditions of 37 °C temperature and a humidified atmosphere comprising 5% CO<sub>2</sub> and 95% air.

## 2. Chemical Characterization of Peptides

### 2.1. RP-HPLC

All samples were dissolved in a small amount of eluant B (0.1% TFA in acetonitrile-water (80:20, v/v)) and injected into the analytical RP-HPLC. This was performed on Exformma (Exformma Technology (ASIA) Co., Ltd, Hong Kong, China) HPLC system. The column used was Hypersil Hypurity C18 column (4.6 mm × 150 mm, 5 µm, 190 Å), and linear gradient elution (0 min 0% B; 2 min 0% B; 22 min 90% B) was applied using eluent A (0.1% TFA in water), and eluant B at flow rate of 1mL/min. The wavelength for the peaks detection is  $\lambda = 220$  nm. In many chromatograms two main peaks are visible. These two peaks come from the two Cf isomers (5-carboxyfluorescein and 6-carboxyfluorescein), because we used the mixture of them as 5(6)-carboxyfluorescein for the synthesis of the fluorescently labelled peptides.

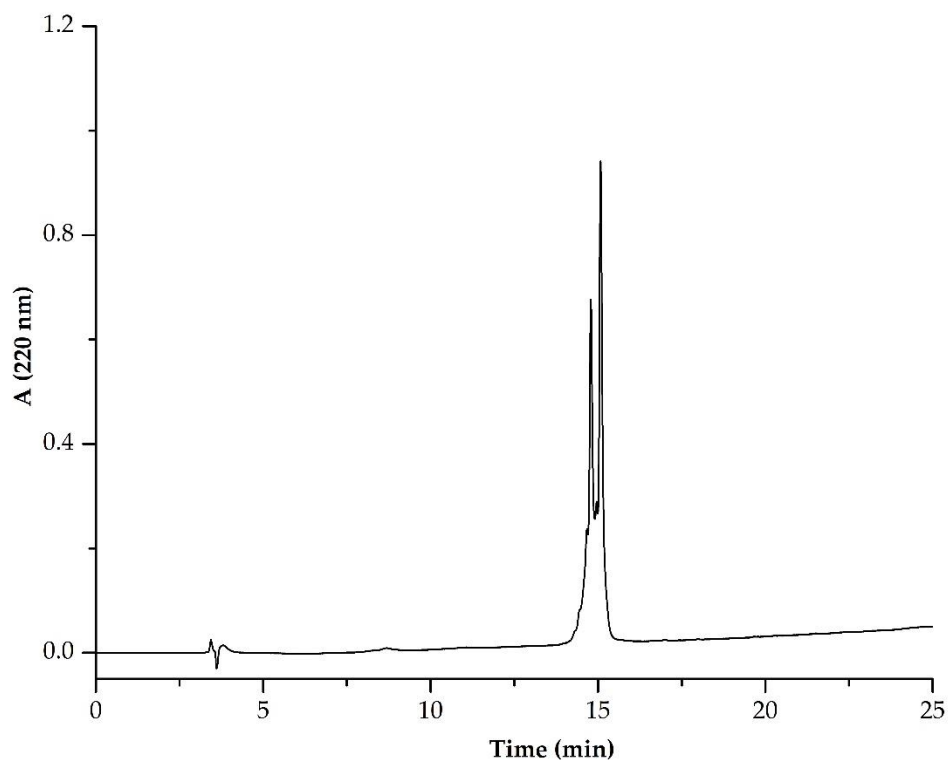

**Figure S1.** HPLC chromatogram of Cf-RQIKIWFQNRRKWKK-NH<sub>2</sub>. Retention time was obtained on Hypersil Hypurity C18 column (4.6 mm × 150 mm, 5 μm, 190 Å). The applied linear gradient elution was 0 min 0% B, 2 min 0% B, 22 min 90% B at 1 mL/min flow rate. The detection was carried on at λ = 220 nm.

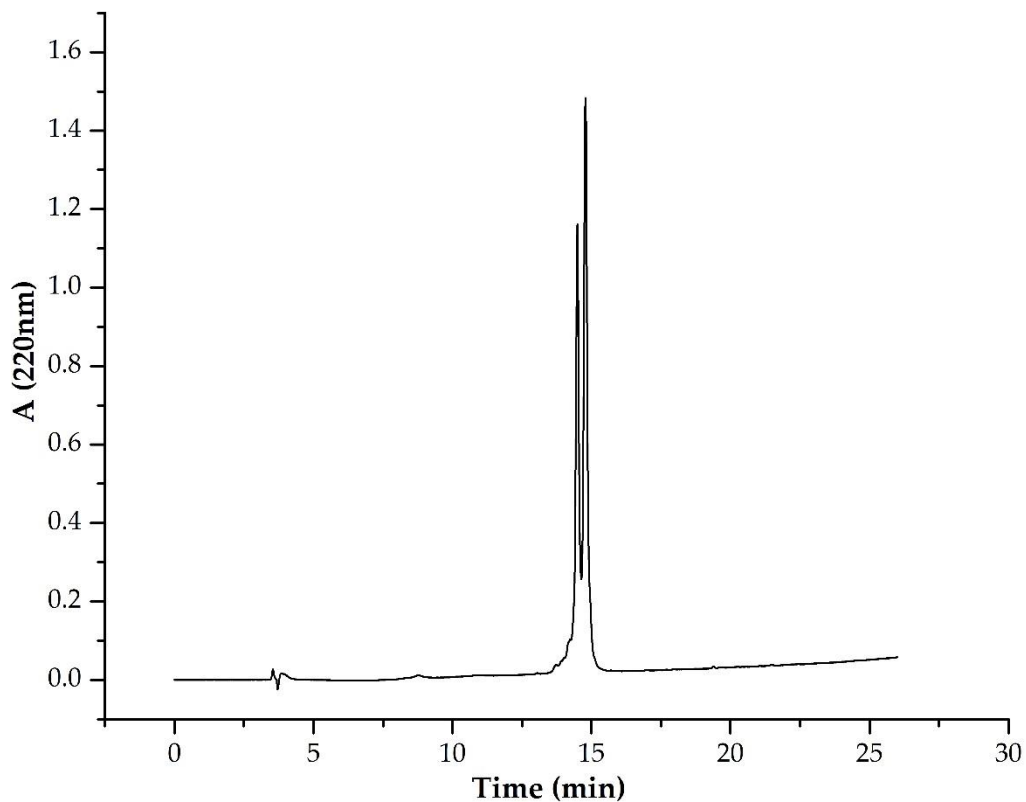

**Figure S2.** HPLC chromatogram of Cf-RQIKIWFQNRRK-azaGly-KK-NH<sub>2</sub>. Retention time was obtained on Hypersil Hypurity C18 column (4.6 mm × 150 mm, 5 μm, 190 Å). The applied linear

gradient elution was 0 min 0% B, 2 min 0% B, 22 min 90% B at 1 mL/min flow rate. The detection was carried on at  $\lambda = 220$  nm.

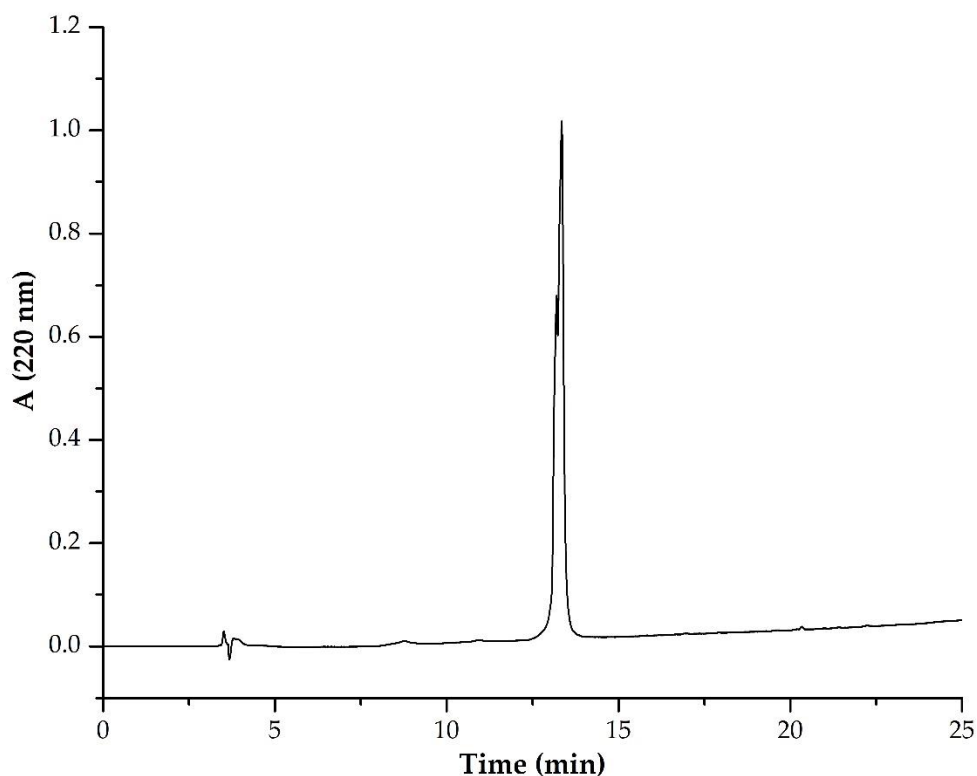

**Figure S3.** HPLC chromatogram of Cf-RQIKI-azaGly-FQNRRKWKK-NH<sub>2</sub>. Retention time was obtained on Hypersil Hypurity C18 column (4.6 mm x 150 mm, 5  $\mu$ m, 190 Å). The applied linear gradient elution was 0 min 0% B, 2 min 0% B, 22 min 90% B at 1 mL/min flow rate. The detection was carried on at  $\lambda = 220$  nm.

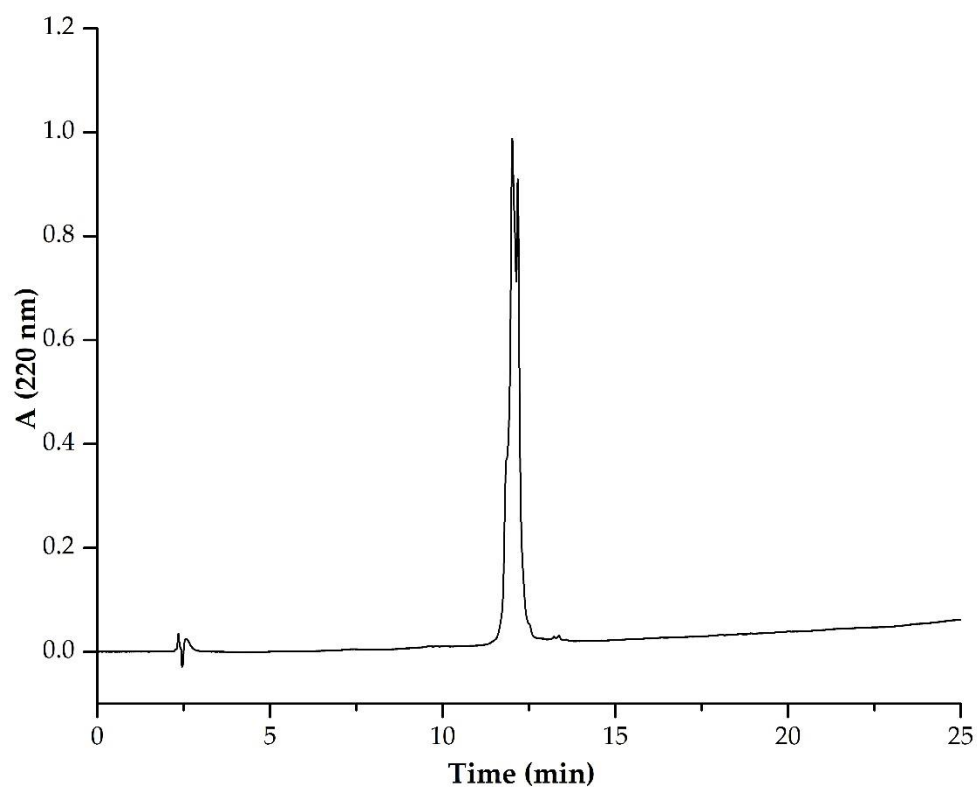

**Figure S4.** HPLC chromatogram of Cf-RQIKI-azaGly-FQNRRK-azaGly-KK-NH<sub>2</sub>. Retention time was obtained on Hypersil Hypurity C18 column (4.6 mm x 150 mm, 5  $\mu$ m, 190 Å). The applied linear gradient elution was 0 min 0% B, 2 min 0% B, 22 min 90% B at 1 mL/min flow rate. The detection was carried on at  $\lambda$  = 220 nm.

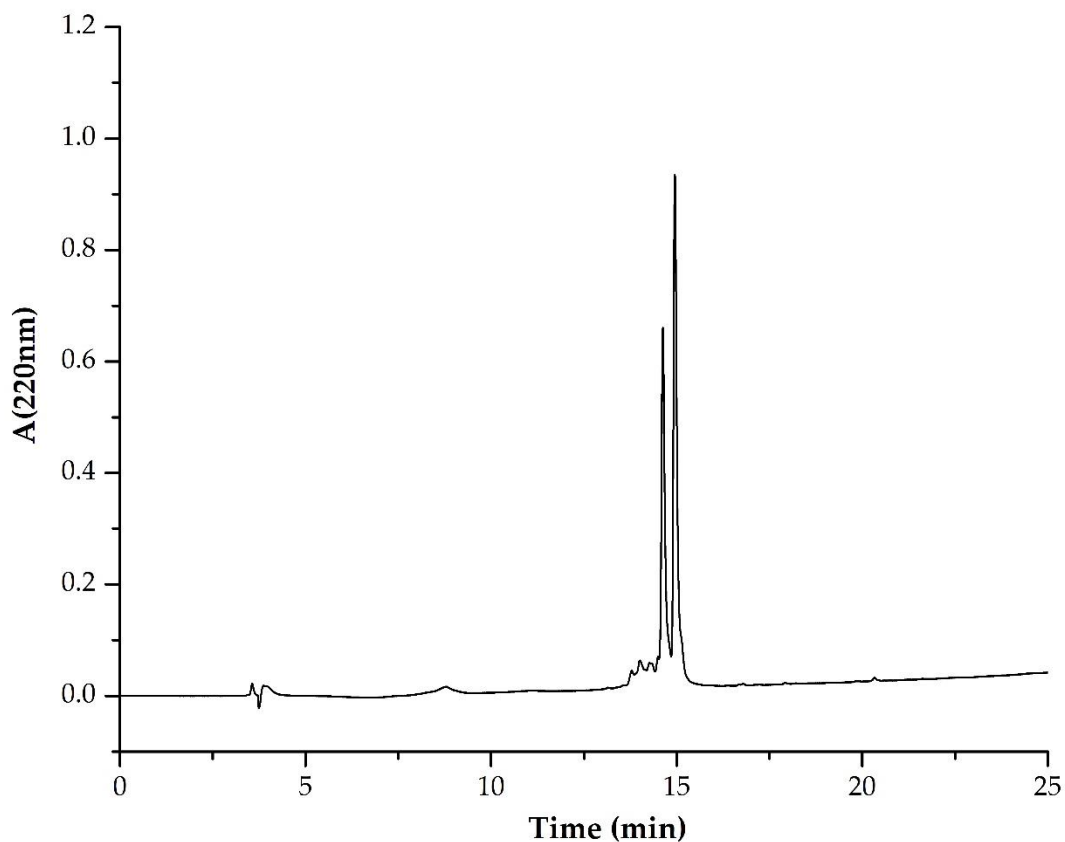

**Figure S5.** HPLC chromatogram of Cf-RQIKIWFQNRRKGKK-NH<sub>2</sub>. Retention time was obtained on Hypersil Hypurity C18 column (4.6 mm x 150 mm, 5  $\mu$ m, 190 Å). The applied linear gradient elution was 0 min 0% B, 2 min 0% B, 22 min 90% B at 1 mL/min flow rate. The detection was carried on at  $\lambda$  = 220 nm.

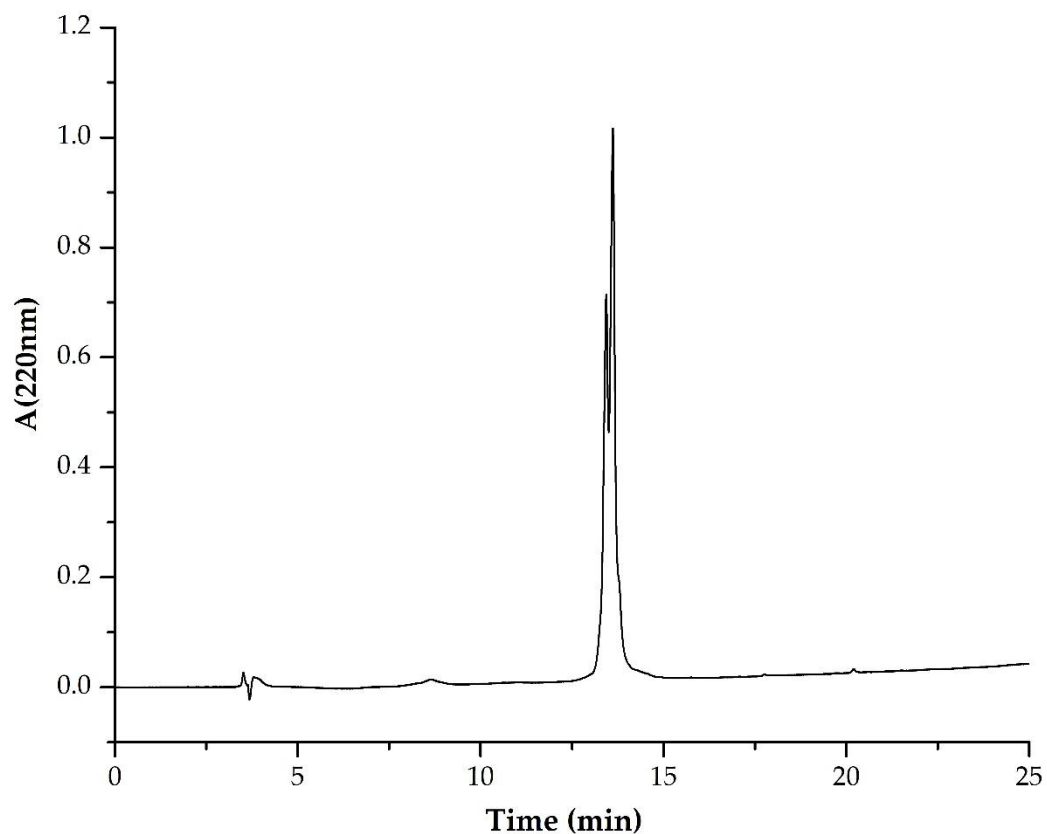

**Figure S6.** HPLC chromatogram of Cf-RQIKIGFQNRKWKKNH<sub>2</sub>. Retention time was obtained on Hypersil Hypurity C18 column (4.6 mm × 150 mm, 5 μm, 190 Å). The applied linear gradient elution was 0 min 0% B, 2 min 0% B, 22 min 90% B at 1 mL/min flow rate. The detection was carried on at  $\lambda = 220$  nm.

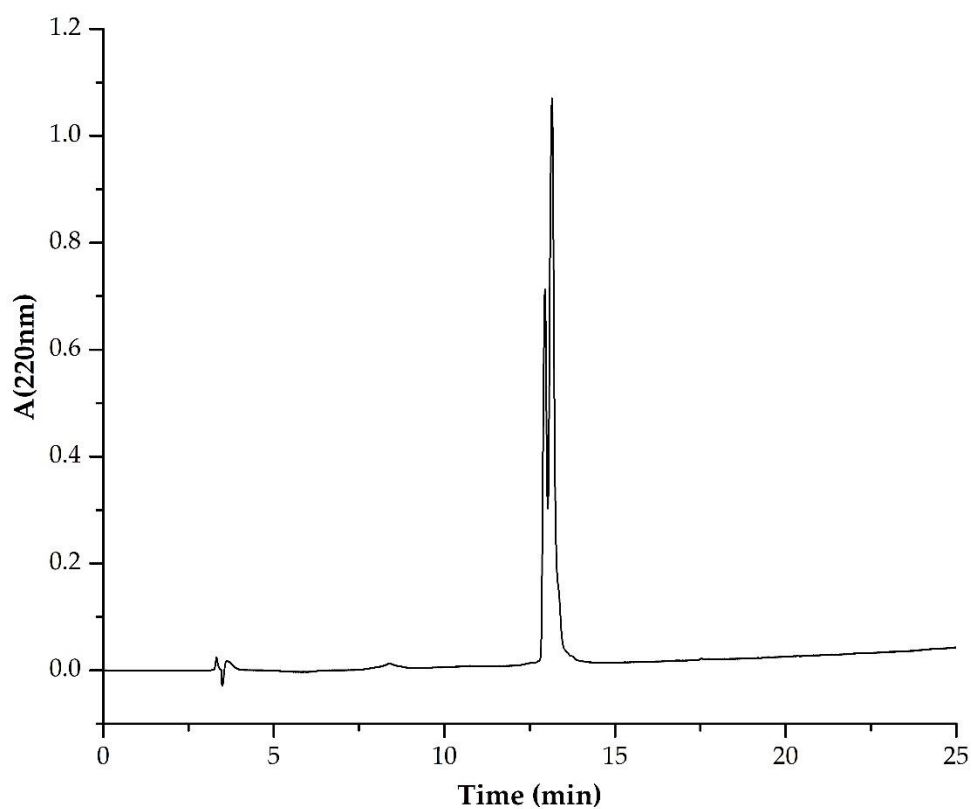

**Figure S7.** HPLC chromatogram of Cf-RQIKIGFQNRRKGKK-NH<sub>2</sub>. Retention time was obtained on Hypersil Hypurity C18 column (4.6 mm x 150 mm, 5 µm, 190 Å). The applied linear gradient elution was 0 min 0% B, 2 min 0% B, 22 min 90% B at 1 mL/min flow rate. The detection was carried on at  $\lambda = 220$  nm.

## 2.2 Mass spectrometry

The determination of the molecular weight of peptides was performed by ESI-MS, using Bruker Amazon SL (Germany). The samples were prepared and dissolved in water-acetonitrile solution (50:50) containing 0.1% formic acid. The injection of the samples was done directly through a syringe pump. Parameters: capillary voltage: 4 kV, nebulizer gas: 10 psi, dry gas: 4 L/min, heated capillary temperature: 250 °C.

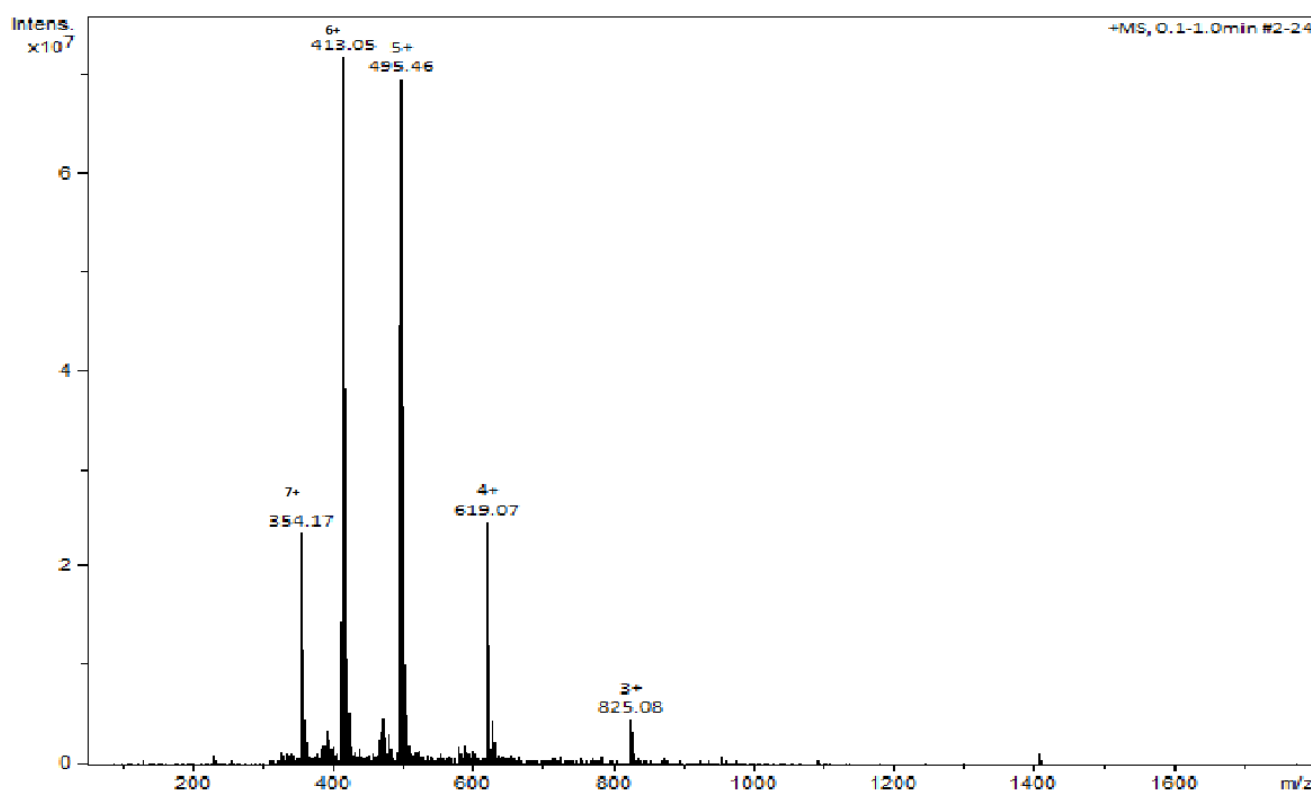

**Figure S8.** MS Spectrum of Cf-RQIKIWFQNRRKWKK-NH<sub>2</sub>. The identification of the conjugate was determined using Bruker Amazon SL (Germany). The sample is dissolved in water-acetonitrile (50:50) with 0.1% formic acid.

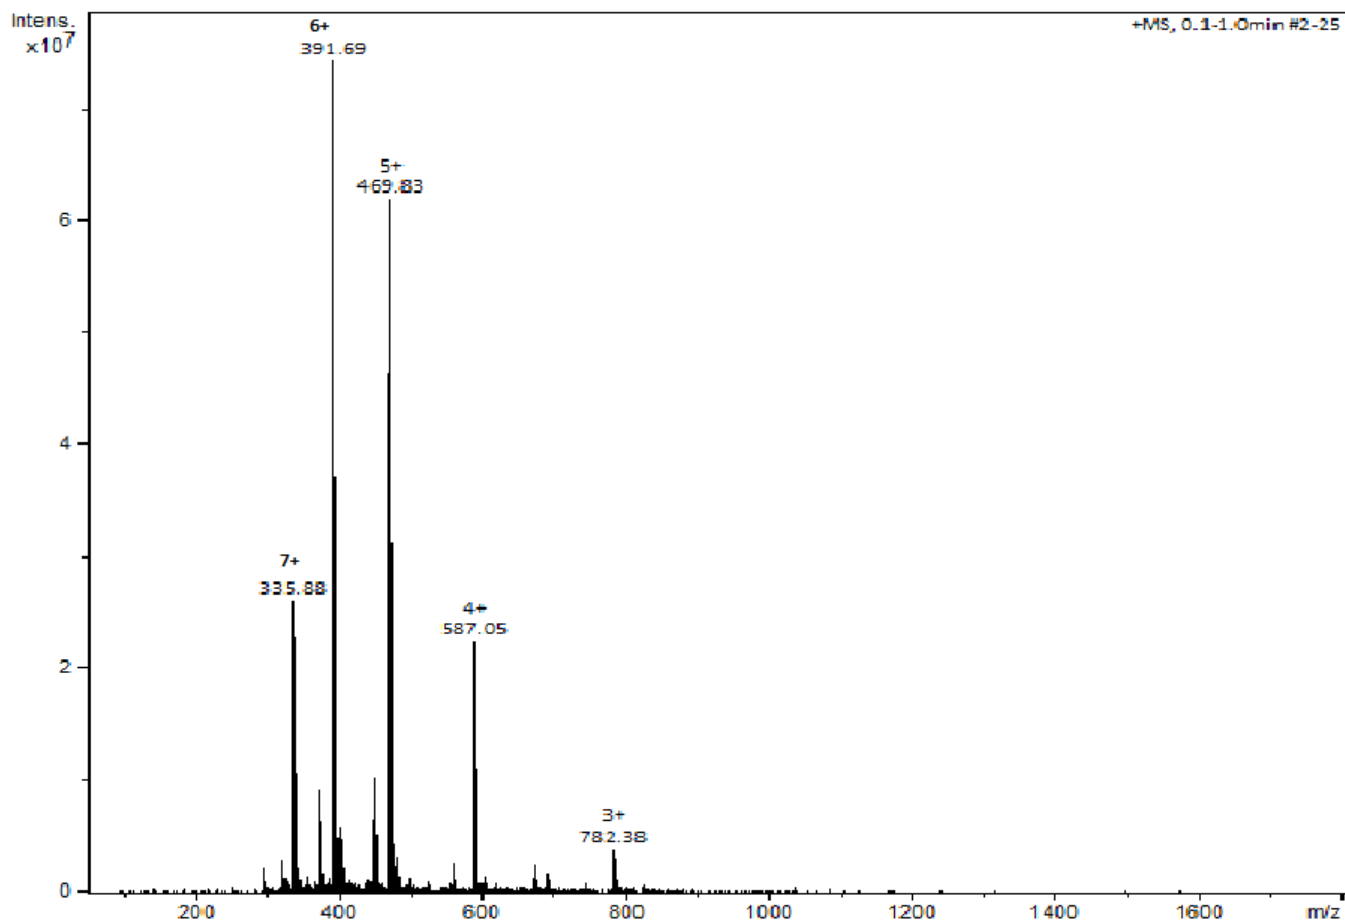

**Figure S9.** MS Spectrum of Cf-RQIKIWFQNRRK-azaGly-KK-NH<sub>2</sub>. The identification of the conjugate was determined using Bruker Amazon SL (Germany). The sample is dissolved in water-acetonitrile (50:50) with 0.1% formic acid.

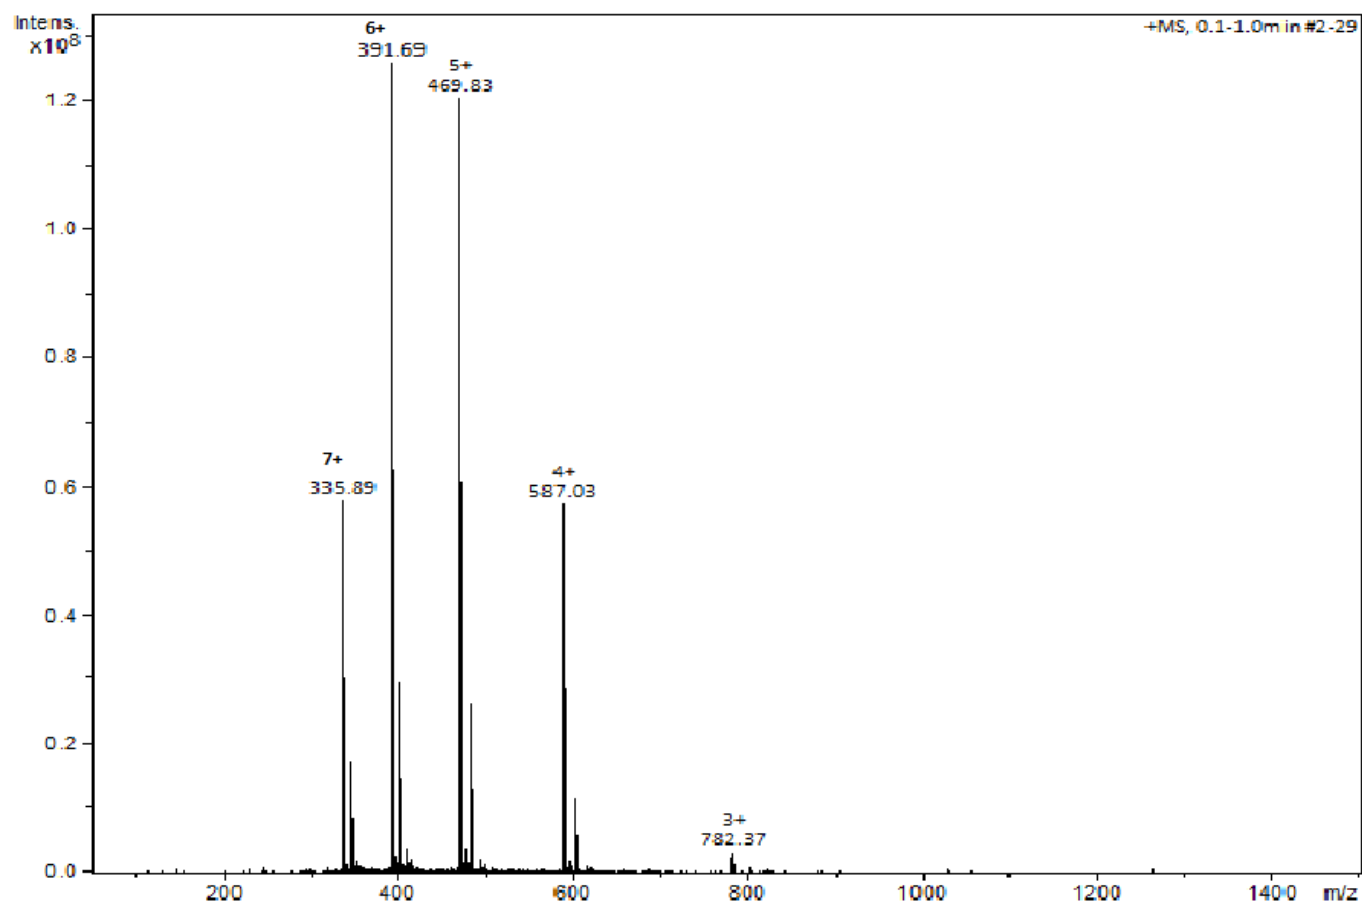

**Figure S10.** MS Spectrum of Cf-RQIKI-azaGly-FQNRRKWKK-NH<sub>2</sub>. The identification of the conjugate was determined using Bruker Amazon SL (Germany). The sample is dissolved in water-acetonitrile (50:50) with 0.1% formic acid.

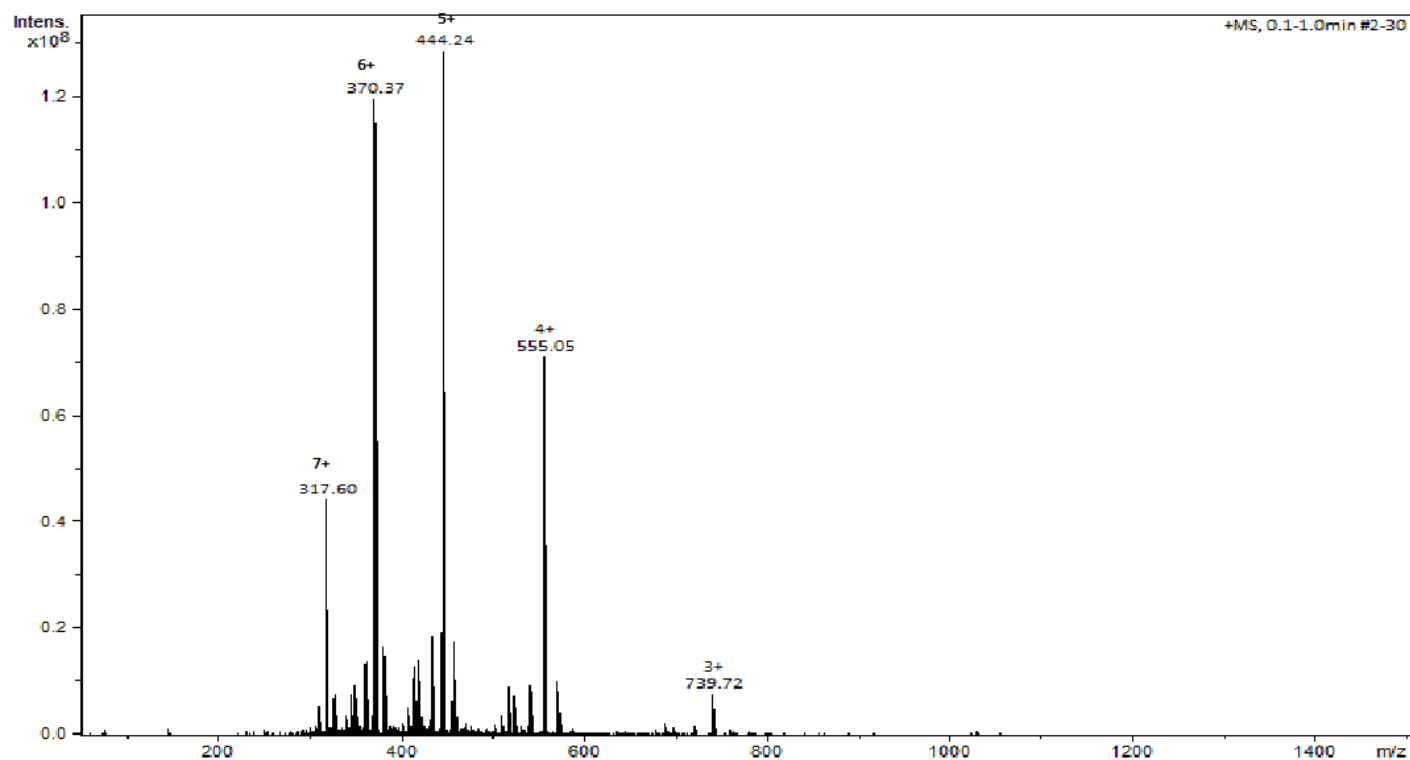

**Figure S11.** MS Spectrum of Cf-RQIKI-azaGly-FQNRRK-azaGly-KK-NH<sub>2</sub>. The identification of the conjugate was determined using Bruker Amazon SL (Germany). The sample is dissolved in water-acetonitrile (50:50) with 0.1% formic acid.

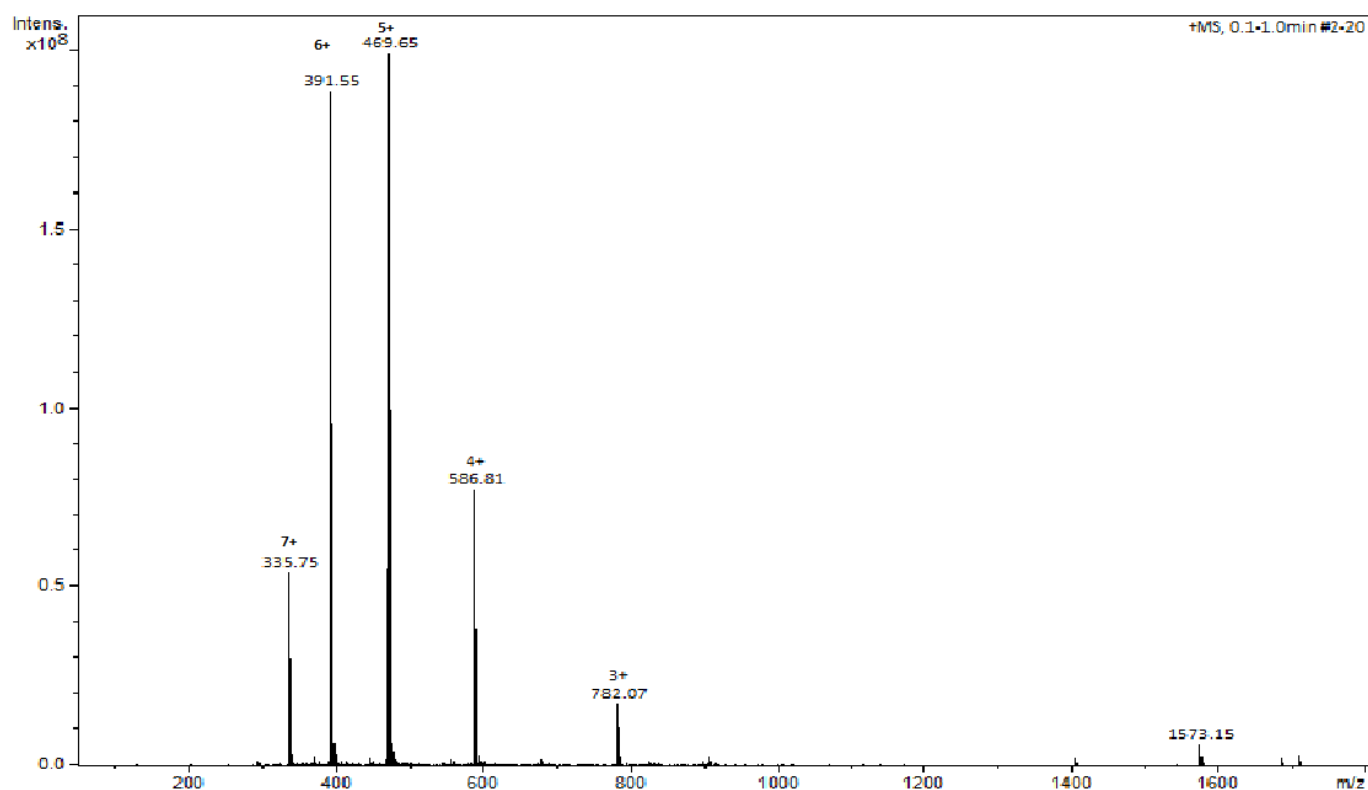

**Figure S12.** MS Spectrum of Cf-RQIKIWFQNRRKGKK-NH<sub>2</sub>. The identification of the conjugate was determined using Bruker Amazon SL (Germany). The sample is dissolved in water-acetonitrile (50:50) with 0.1% formic acid.

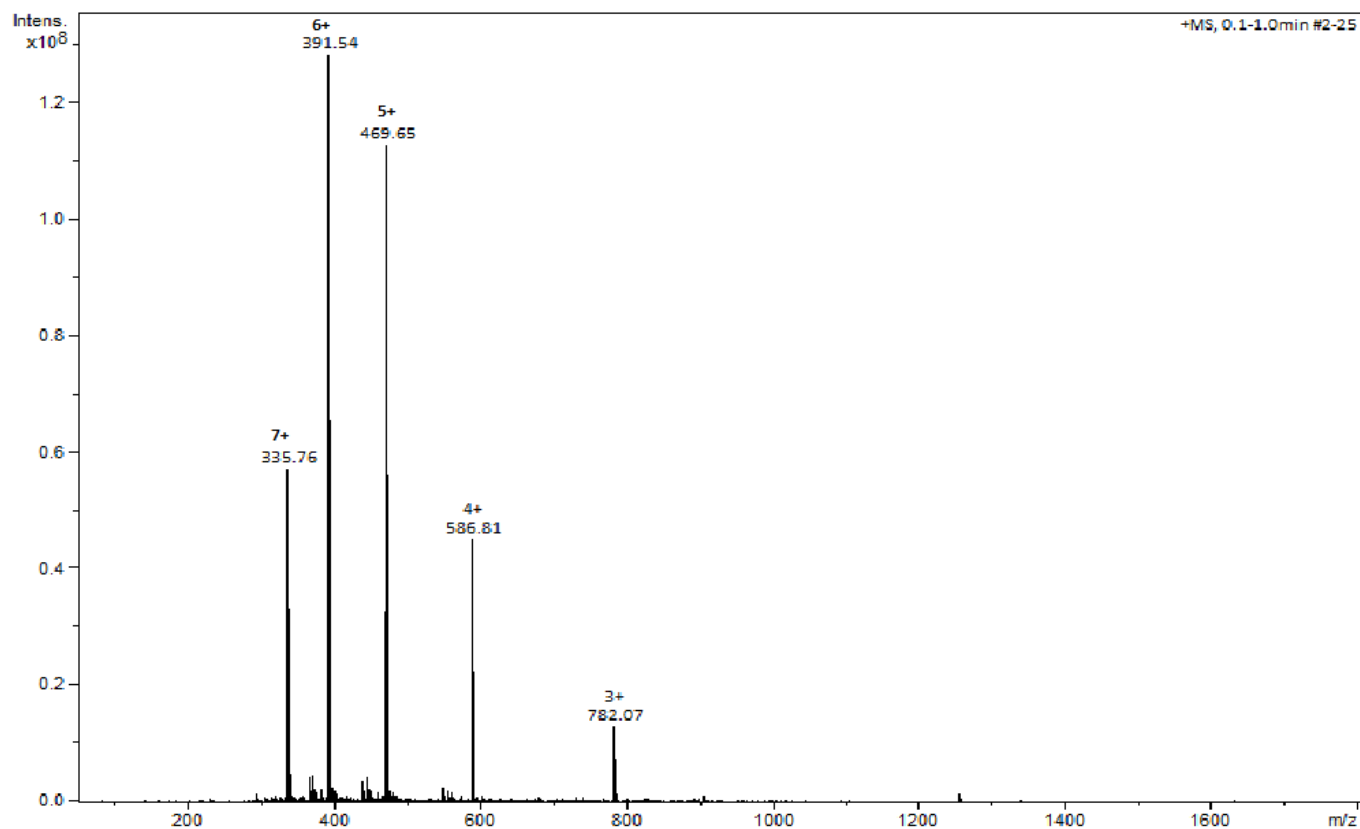

**Figure S13.** MS Spectrum of Cf-RQIKIGFQNRRKWKK-NH<sub>2</sub>. The identification of the conjugate was determined using Bruker Amazon SL (Germany). The sample is dissolved in water-acetonitrile (50:50) with 0.1% formic acid.

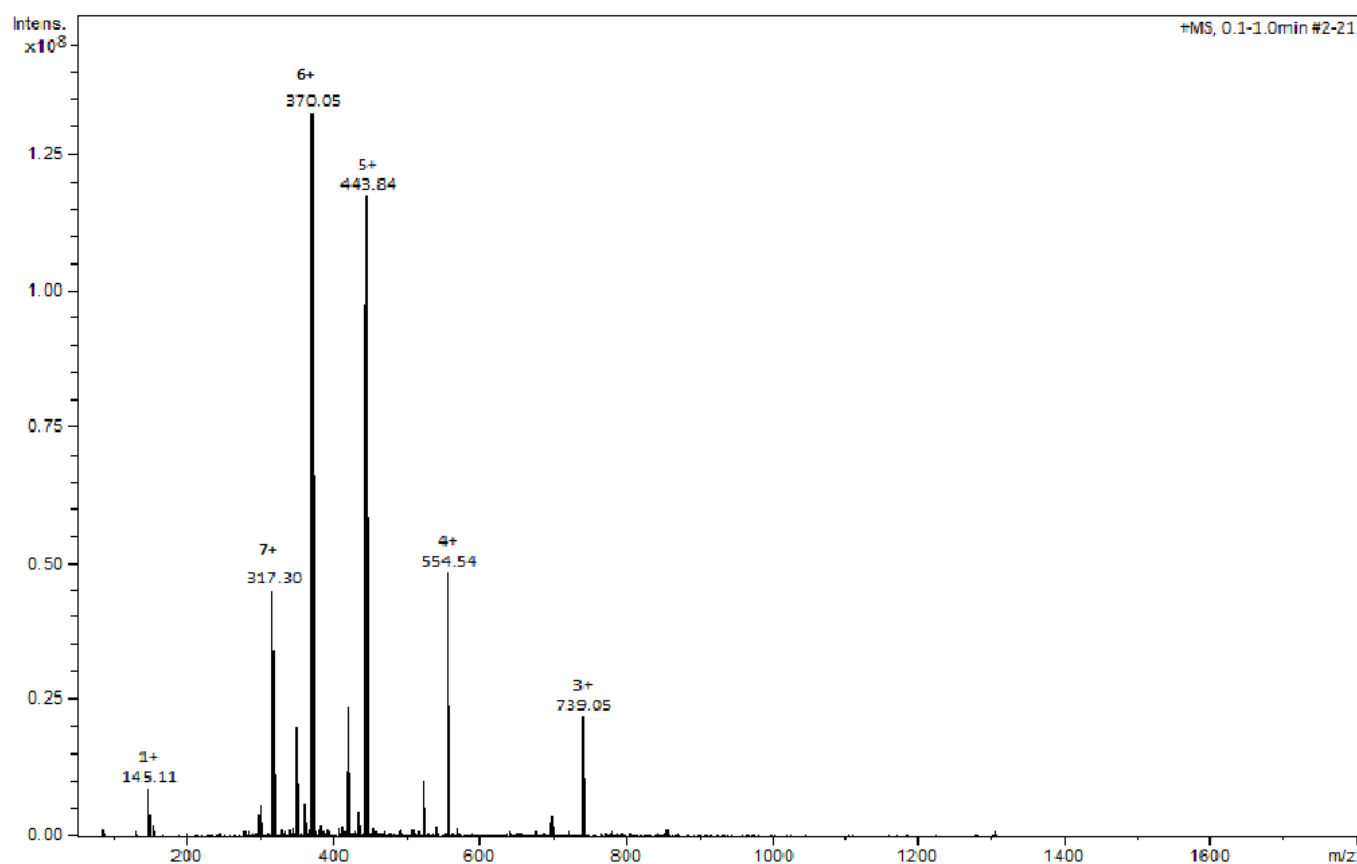

**Figure S14.** MS Spectrum of Cf-RQIKIGFQNRRKGKK-NH<sub>2</sub>. The identification of the conjugate was determined using Bruker Amazon SL (Germany). The sample is dissolved in water-acetonitrile (50:50) with 0.1% formic acid.

### 3. Cytotoxicity of Peptide Conjugates

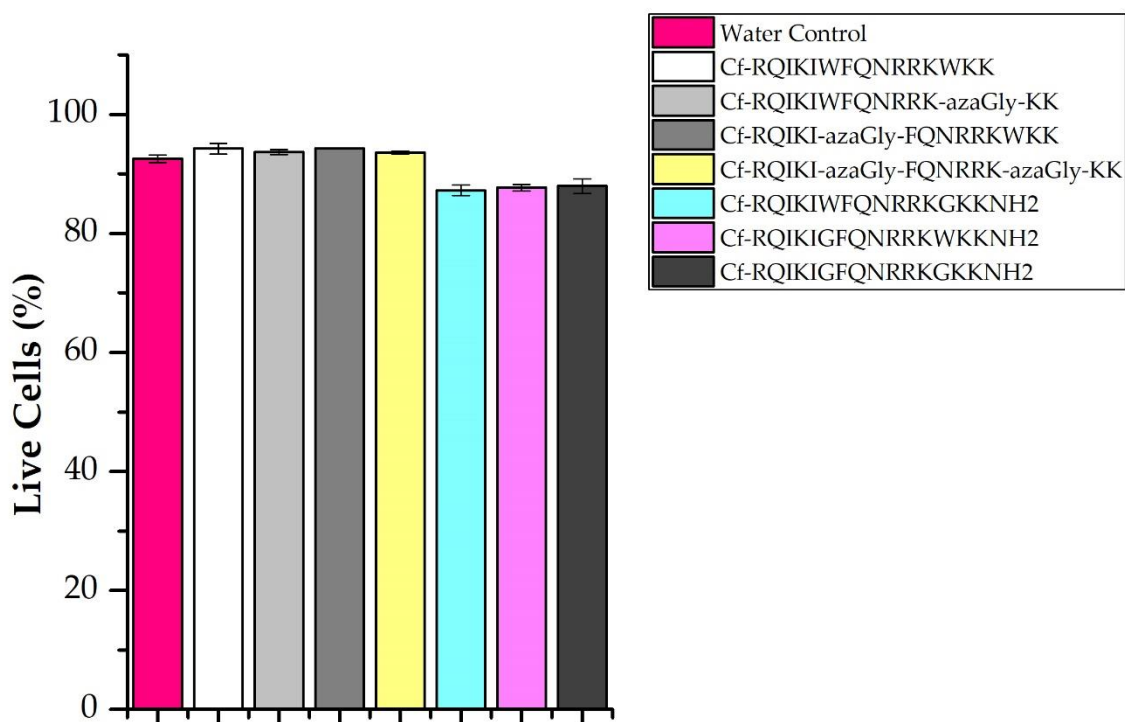

**Figure S15.** Evaluation of the cytotoxicity of peptides by examining the percentage of live cells by flow cytometry technique. Cells were incubated with 5  $\mu$ M peptide solution for 90 min at 37°C.

### 4. ECD measurement

The UV-CD measurements were performed on a JASCO (Tokyo, Japan) J-1500 spectropolarimeter. Each spectrum was the average of five scans collected in the far UV (185-260 nm) range with a 0.1 mm path length quartz cell. The following settings were used throughout the measurements: a temperature control system at room temperature, the bandwidth of 1 nm, 0.2 nm step size, 4 s response time, and a scan rate of 50 nm/min. All spectra were corrected by subtracting the solvent spectrum acquired under identical conditions. All CD data were processed from mDeg to mean residue ellipticity ( $\text{deg cm}^2 \text{dmol}^{-1}$ ) using the Spectra Analysis function of Jasco Spectra Manager, to account for the concentration differences.

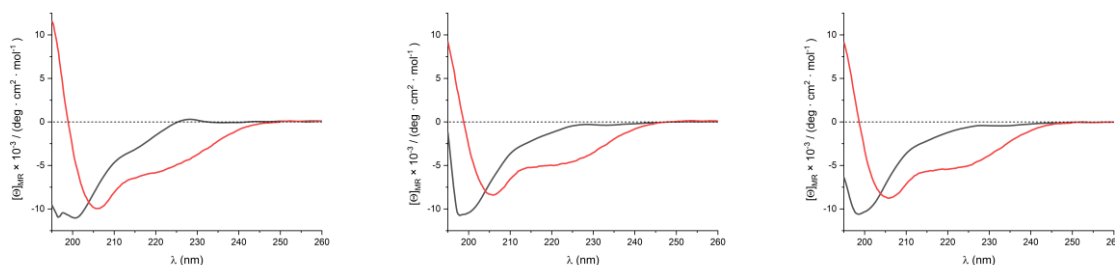

**Figure S16.** ECD spectra in PBS buffer, pH: 7.3 at 25°C (black) and 50 % TFE in PBS buffer (red) of Pen(desMet) (left panel), Trp56aGlyPen(desMet) (middle panel) and Trp56GlyPen(desMet) (right panel).

## 5. Calculations

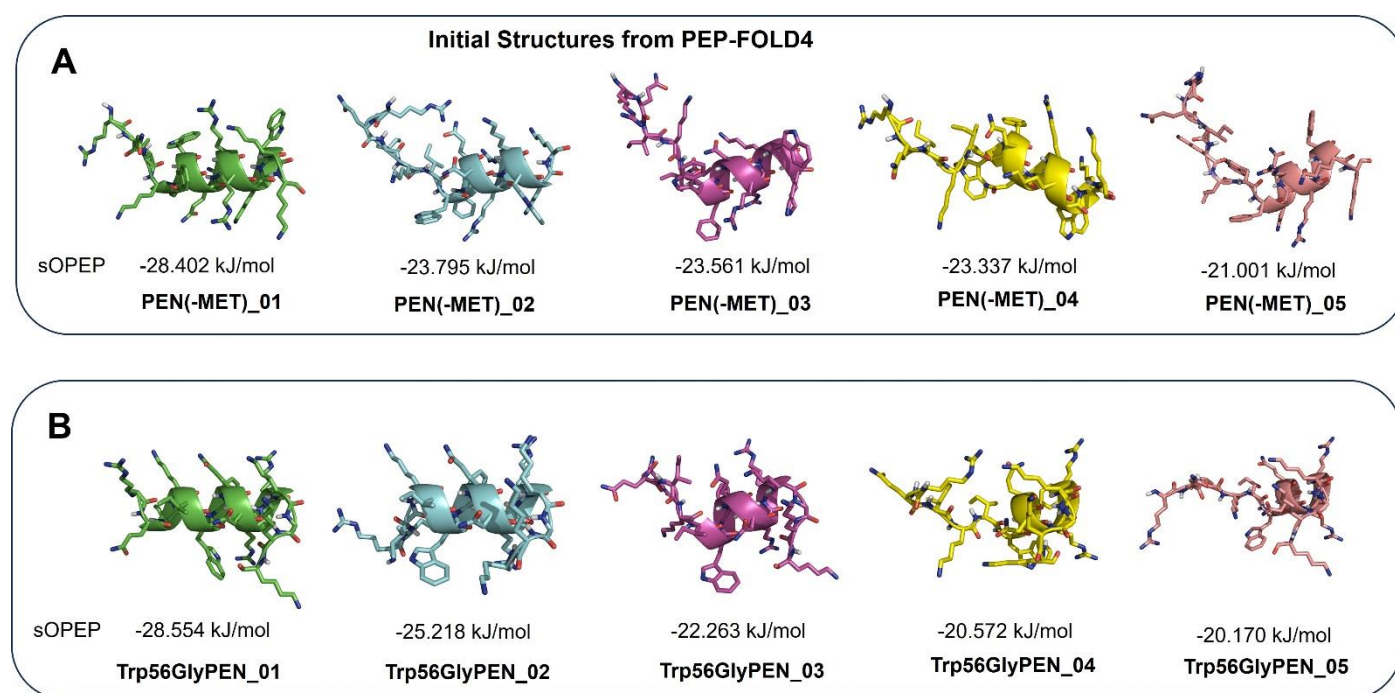

**Figure S17.** Initial structures of PEN(-Met) and Trp56GlyPen peptide were generated from PEP-Fold4. The best five structures of model peptides were shown with the sOPEP energy for each conformer.

Table S1. The coordinates of optimized structures of model peptides, Pen(-Met), Trp56aGlyPen, and Trp56GlyPen at the wB97XD/3-21G\* level of theory.

| TITLE  | Pen(-Met)                                          |     |         |         |        |        |   |
|--------|----------------------------------------------------|-----|---------|---------|--------|--------|---|
| REMARK | Created by GaussView 6.1.1, E = -7066.4308708 a.u. |     |         |         |        |        |   |
| ATOM   | 1                                                  | N   | ARG A 1 | -14.562 | 0.239  | 1.661  | N |
| ATOM   | 2                                                  | CA  | ARG A 1 | -14.639 | -0.989 | 0.840  | C |
| ATOM   | 3                                                  | C   | ARG A 1 | -13.569 | -0.912 | -0.271 | C |
| ATOM   | 4                                                  | O   | ARG A 1 | -13.555 | -1.626 | -1.287 | O |
| ATOM   | 5                                                  | CB  | ARG A 1 | -16.046 | -1.261 | 0.263  | C |
| ATOM   | 6                                                  | CG  | ARG A 1 | -16.234 | -2.701 | -0.257 | C |
| ATOM   | 7                                                  | CD  | ARG A 1 | -17.695 | -2.917 | -0.692 | C |
| ATOM   | 8                                                  | NE  | ARG A 1 | -17.912 | -4.317 | -1.117 | N |
| ATOM   | 9                                                  | CZ  | ARG A 1 | -19.115 | -4.903 | -1.173 | C |
| ATOM   | 10                                                 | NH1 | ARG A 1 | -19.209 | -6.225 | -1.355 | N |
| ATOM   | 11                                                 | NH2 | ARG A 1 | -20.227 | -4.174 | -1.038 | N |
| ATOM   | 12                                                 | H   | ARG A 1 | -14.722 | 0.070  | 2.652  | H |
| ATOM   | 13                                                 | H01 | ARG A 1 | -21.130 | -4.610 | -0.898 | H |
| ATOM   | 14                                                 | H02 | ARG A 1 | -15.186 | 0.974  | 1.323  | H |
| ATOM   | 15                                                 | H03 | ARG A 1 | -14.356 | -1.832 | 1.481  | H |
| ATOM   | 16                                                 | H04 | ARG A 1 | -16.253 | -0.544 | -0.541 | H |
| ATOM   | 17                                                 | H05 | ARG A 1 | -15.999 | -3.411 | 0.545  | H |
| ATOM   | 18                                                 | H06 | ARG A 1 | -17.942 | -2.233 | -1.513 | H |
| ATOM   | 19                                                 | H07 | ARG A 1 | -17.099 | -4.842 | -1.418 | H |
| ATOM   | 20                                                 | H08 | ARG A 1 | -18.407 | -6.836 | -1.261 | H |
| ATOM   | 21                                                 | H09 | ARG A 1 | -20.216 | -3.165 | -1.112 | H |
| ATOM   | 22                                                 | H10 | ARG A 1 | -16.764 | -1.077 | 1.071  | H |
| ATOM   | 23                                                 | H11 | ARG A 1 | -15.542 | -2.861 | -1.087 | H |
| ATOM   | 24                                                 | H12 | ARG A 1 | -18.357 | -2.713 | 0.157  | H |
| ATOM   | 25                                                 | H13 | ARG A 1 | -20.093 | -6.668 | -1.579 | H |
| ATOM   | 26                                                 | N   | GLN A 2 | -12.621 | 0.021  | 0.014  | N |
| ATOM   | 27                                                 | CA  | GLN A 2 | -11.499 | 0.260  | -0.882 | C |
| ATOM   | 28                                                 | C   | GLN A 2 | -10.285 | 0.679  | -0.046 | C |
| ATOM   | 29                                                 | O   | GLN A 2 | -9.866  | 1.867  | -0.044 | O |
| ATOM   | 30                                                 | CB  | GLN A 2 | -11.757 | 1.344  | -1.935 | C |
| ATOM   | 31                                                 | CG  | GLN A 2 | -12.893 | 1.005  | -2.903 | C |
| ATOM   | 32                                                 | CD  | GLN A 2 | -12.808 | 1.884  | -4.142 | C |
| ATOM   | 33                                                 | NE2 | GLN A 2 | -13.616 | 1.562  | -5.153 | N |
| ATOM   | 34                                                 | OE1 | GLN A 2 | -12.019 | 2.862  | -4.229 | O |
| ATOM   | 35                                                 | H   | GLN A 2 | -12.859 | 0.590  | 0.838  | H |
| ATOM   | 36                                                 | H01 | GLN A 2 | -14.237 | 0.764  | -5.120 | H |
| ATOM   | 37                                                 | H02 | GLN A 2 | -11.296 | -0.692 | -1.389 | H |
| ATOM   | 38                                                 | H03 | GLN A 2 | -10.835 | 1.476  | -2.510 | H |
| ATOM   | 39                                                 | H04 | GLN A 2 | -13.863 | 1.175  | -2.423 | H |
| ATOM   | 40                                                 | H05 | GLN A 2 | -13.612 | 2.128  | -5.995 | H |
| ATOM   | 41                                                 | H06 | GLN A 2 | -11.966 | 2.286  | -1.421 | H |
| ATOM   | 42                                                 | H07 | GLN A 2 | -12.866 | -0.052 | -3.183 | H |
| ATOM   | 43                                                 | N   | ILE A 3 | -9.679  | -0.281 | 0.678  | N |
| ATOM   | 44                                                 | CA  | ILE A 3 | -8.604  | 0.045  | 1.640  | C |
| ATOM   | 45                                                 | C   | ILE A 3 | -7.276  | 0.209  | 0.866  | C |
| ATOM   | 46                                                 | O   | ILE A 3 | -6.331  | -0.606 | 0.886  | O |
| ATOM   | 47                                                 | CB  | ILE A 3 | -8.501  | -0.984 | 2.775  | C |
| ATOM   | 48                                                 | CG1 | ILE A 3 | -9.865  | -1.150 | 3.483  | C |
| ATOM   | 49                                                 | CG2 | ILE A 3 | -7.431  | -0.502 | 3.776  | C |
| ATOM   | 50                                                 | CD  | ILE A 3 | -9.860  | -2.286 | 4.522  | C |
| ATOM   | 51                                                 | H   | ILE A 3 | -10.018 | -1.236 | 0.641  | H |
| ATOM   | 52                                                 | H01 | ILE A 3 | -9.544  | -3.230 | 4.064  | H |
| ATOM   | 53                                                 | H02 | ILE A 3 | -8.859  | 1.020  | 2.072  | H |
| ATOM   | 54                                                 | H03 | ILE A 3 | -8.193  | -1.946 | 2.348  | H |
| ATOM   | 55                                                 | H04 | ILE A 3 | -10.649 | -1.357 | 2.746  | H |
| ATOM   | 56                                                 | H05 | ILE A 3 | -7.309  | -1.228 | 4.583  | H |
| ATOM   | 57                                                 | H06 | ILE A 3 | -10.863 | -2.429 | 4.932  | H |
| ATOM   | 58                                                 | H07 | ILE A 3 | -10.125 | -0.202 | 3.970  | H |
| ATOM   | 59                                                 | H08 | ILE A 3 | -7.737  | 0.451  | 4.225  | H |
| ATOM   | 60                                                 | H09 | ILE A 3 | -9.196  | -2.062 | 5.361  | H |
| ATOM   | 61                                                 | H10 | ILE A 3 | -6.460  | -0.383 | 3.290  | H |

|      |     |     |     |   |   |         |        |        |   |
|------|-----|-----|-----|---|---|---------|--------|--------|---|
| ATOM | 62  | N   | LYS | A | 4 | -7.227  | 1.383  | 0.184  | N |
| ATOM | 63  | CA  | LYS | A | 4 | -6.141  | 1.709  | -0.737 | C |
| ATOM | 64  | C   | LYS | A | 4 | -4.862  | 2.108  | 0.013  | C |
| ATOM | 65  | O   | LYS | A | 4 | -3.769  | 2.283  | -0.582 | O |
| ATOM | 66  | CB  | LYS | A | 4 | -6.624  | 2.796  | -1.718 | C |
| ATOM | 67  | CG  | LYS | A | 4 | -7.720  | 2.227  | -2.651 | C |
| ATOM | 68  | CD  | LYS | A | 4 | -8.590  | 3.289  | -3.356 | C |
| ATOM | 69  | CE  | LYS | A | 4 | -9.426  | 4.091  | -2.343 | C |
| ATOM | 70  | NZ  | LYS | A | 4 | -10.640 | 4.692  | -3.047 | N |
| ATOM | 71  | H   | LYS | A | 4 | -8.115  | 1.907  | 0.127  | H |
| ATOM | 72  | H01 | LYS | A | 4 | -11.253 | 3.888  | -3.466 | H |
| ATOM | 73  | H02 | LYS | A | 4 | -5.864  | 0.809  | -1.301 | H |
| ATOM | 74  | H03 | LYS | A | 4 | -5.769  | 3.147  | -2.302 | H |
| ATOM | 75  | H04 | LYS | A | 4 | -8.391  | 1.589  | -2.069 | H |
| ATOM | 76  | H05 | LYS | A | 4 | -9.278  | 2.766  | -4.032 | H |
| ATOM | 77  | H06 | LYS | A | 4 | -8.862  | 4.914  | -1.901 | H |
| ATOM | 78  | H07 | LYS | A | 4 | -10.350 | 5.299  | -3.827 | H |
| ATOM | 79  | H08 | LYS | A | 4 | -7.003  | 3.640  | -1.129 | H |
| ATOM | 80  | H09 | LYS | A | 4 | -7.243  | 1.599  | -3.411 | H |
| ATOM | 81  | H10 | LYS | A | 4 | -7.970  | 3.959  | -3.962 | H |
| ATOM | 82  | H11 | LYS | A | 4 | -9.807  | 3.437  | -1.554 | H |
| ATOM | 83  | H12 | LYS | A | 4 | -11.208 | 5.253  | -2.399 | H |
| ATOM | 84  | N   | ILE | A | 5 | -4.976  | 2.136  | 1.347  | N |
| ATOM | 85  | CA  | ILE | A | 5 | -3.799  | 2.135  | 2.207  | C |
| ATOM | 86  | C   | ILE | A | 5 | -2.878  | 1.003  | 1.767  | C |
| ATOM | 87  | O   | ILE | A | 5 | -1.634  | 1.113  | 1.868  | O |
| ATOM | 88  | CB  | ILE | A | 5 | -4.189  | 1.953  | 3.698  | C |
| ATOM | 89  | CG1 | ILE | A | 5 | -5.242  | 3.005  | 4.115  | C |
| ATOM | 90  | CG2 | ILE | A | 5 | -2.924  | 2.089  | 4.568  | C |
| ATOM | 91  | CD  | ILE | A | 5 | -5.691  | 2.852  | 5.579  | C |
| ATOM | 92  | H   | ILE | A | 5 | -5.898  | 2.052  | 1.754  | H |
| ATOM | 93  | H01 | ILE | A | 5 | -6.033  | 1.829  | 5.772  | H |
| ATOM | 94  | H02 | ILE | A | 5 | -3.245  | 3.068  | 2.109  | H |
| ATOM | 95  | H03 | ILE | A | 5 | -4.617  | 0.949  | 3.814  | H |
| ATOM | 96  | H04 | ILE | A | 5 | -6.136  | 2.925  | 3.484  | H |
| ATOM | 97  | H05 | ILE | A | 5 | -2.557  | 3.120  | 4.524  | H |
| ATOM | 98  | H06 | ILE | A | 5 | -6.516  | 3.535  | 5.797  | H |
| ATOM | 99  | H07 | ILE | A | 5 | -4.817  | 4.003  | 3.950  | H |
| ATOM | 100 | H08 | ILE | A | 5 | -2.111  | 1.442  | 4.233  | H |
| ATOM | 101 | H09 | ILE | A | 5 | -4.880  | 3.082  | 6.274  | H |
| ATOM | 102 | H10 | ILE | A | 5 | -3.155  | 1.845  | 5.607  | H |
| ATOM | 103 | N   | TRP | A | 6 | -3.445  | -0.121 | 1.304  | N |
| ATOM | 104 | CA  | TRP | A | 6 | -2.565  | -1.237 | 0.965  | C |
| ATOM | 105 | C   | TRP | A | 6 | -1.622  | -0.904 | -0.185 | C |
| ATOM | 106 | O   | TRP | A | 6 | -0.469  | -1.390 | -0.219 | O |
| ATOM | 107 | CB  | TRP | A | 6 | -3.413  | -2.497 | 0.672  | C |
| ATOM | 108 | CG  | TRP | A | 6 | -3.848  | -3.068 | 1.983  | C |
| ATOM | 109 | CD1 | TRP | A | 6 | -5.063  | -2.977 | 2.603  | C |
| ATOM | 110 | CD2 | TRP | A | 6 | -2.947  | -3.707 | 2.908  | C |
| ATOM | 111 | CE2 | TRP | A | 6 | -3.685  | -3.981 | 4.086  | C |
| ATOM | 112 | CE3 | TRP | A | 6 | -1.589  | -4.054 | 2.834  | C |
| ATOM | 113 | NE1 | TRP | A | 6 | -4.975  | -3.529 | 3.874  | N |
| ATOM | 114 | CZ2 | TRP | A | 6 | -3.087  | -4.592 | 5.192  | C |
| ATOM | 115 | CZ3 | TRP | A | 6 | -0.998  | -4.655 | 3.937  | C |
| ATOM | 116 | CH2 | TRP | A | 6 | -1.743  | -4.917 | 5.105  | C |
| ATOM | 117 | H   | TRP | A | 6 | -4.461  | -0.255 | 1.245  | H |
| ATOM | 118 | H01 | TRP | A | 6 | -1.260  | -5.400 | 5.945  | H |
| ATOM | 119 | H02 | TRP | A | 6 | -1.924  | -1.443 | 1.823  | H |
| ATOM | 120 | H03 | TRP | A | 6 | -2.791  | -3.220 | 0.133  | H |
| ATOM | 121 | H04 | TRP | A | 6 | -5.966  | -2.529 | 2.225  | H |
| ATOM | 122 | H05 | TRP | A | 6 | -1.025  | -3.881 | 1.922  | H |
| ATOM | 123 | H06 | TRP | A | 6 | -5.747  | -3.654 | 4.513  | H |
| ATOM | 124 | H07 | TRP | A | 6 | -3.651  | -4.816 | 6.088  | H |
| ATOM | 125 | H08 | TRP | A | 6 | 0.043   | -4.956 | 3.899  | H |
| ATOM | 126 | H09 | TRP | A | 6 | -4.265  | -2.231 | 0.039  | H |
| ATOM | 127 | N   | PHE | A | 7 | -2.099  | -0.098 | -1.148 | N |

|      |     |     |          |        |        |        |   |
|------|-----|-----|----------|--------|--------|--------|---|
| ATOM | 128 | CA  | PHE A 7  | -1.214 | 0.374  | -2.218 | C |
| ATOM | 129 | C   | PHE A 7  | -0.083 | 1.194  | -1.596 | C |
| ATOM | 130 | O   | PHE A 7  | 1.119  | 1.028  | -1.863 | O |
| ATOM | 131 | CB  | PHE A 7  | -2.028 | 1.248  | -3.199 | C |
| ATOM | 132 | CG  | PHE A 7  | -1.112 | 2.002  | -4.138 | C |
| ATOM | 133 | CD1 | PHE A 7  | -0.618 | 1.390  | -5.291 | C |
| ATOM | 134 | CD2 | PHE A 7  | -0.721 | 3.309  | -3.840 | C |
| ATOM | 135 | CE1 | PHE A 7  | 0.250  | 2.075  | -6.137 | C |
| ATOM | 136 | CE2 | PHE A 7  | 0.146  | 3.996  | -4.685 | C |
| ATOM | 137 | CZ  | PHE A 7  | 0.633  | 3.380  | -5.836 | C |
| ATOM | 138 | H   | PHE A 7  | -2.981 | 0.392  | -1.014 | H |
| ATOM | 139 | H01 | PHE A 7  | 1.287  | 3.920  | -6.509 | H |
| ATOM | 140 | H02 | PHE A 7  | -0.750 | -0.469 | -2.731 | H |
| ATOM | 141 | H03 | PHE A 7  | -2.639 | 1.944  | -2.616 | H |
| ATOM | 142 | H04 | PHE A 7  | -0.928 | 0.381  | -5.539 | H |
| ATOM | 143 | H05 | PHE A 7  | -1.108 | 3.791  | -2.948 | H |
| ATOM | 144 | H06 | PHE A 7  | 0.610  | 1.600  | -7.041 | H |
| ATOM | 145 | H07 | PHE A 7  | 0.419  | 5.021  | -4.462 | H |
| ATOM | 146 | H08 | PHE A 7  | -2.701 | 0.595  | -3.764 | H |
| ATOM | 147 | N   | GLN A 8  | -0.508 | 2.115  | -0.698 | N |
| ATOM | 148 | CA  | GLN A 8  | 0.494  | 2.893  | 0.016  | C |
| ATOM | 149 | C   | GLN A 8  | 1.533  | 1.933  | 0.621  | C |
| ATOM | 150 | O   | GLN A 8  | 2.761  | 2.183  | 0.621  | O |
| ATOM | 151 | CB  | GLN A 8  | -0.102 | 3.633  | 1.220  | C |
| ATOM | 152 | CG  | GLN A 8  | -1.283 | 4.575  | 1.001  | C |
| ATOM | 153 | CD  | GLN A 8  | -1.726 | 5.059  | 2.388  | C |
| ATOM | 154 | NE2 | GLN A 8  | -2.833 | 5.822  | 2.417  | N |
| ATOM | 155 | OE1 | GLN A 8  | -1.113 | 4.749  | 3.435  | O |
| ATOM | 156 | H   | GLN A 8  | -1.492 | 2.189  | -0.457 | H |
| ATOM | 157 | H01 | GLN A 8  | -3.300 | 6.126  | 1.574  | H |
| ATOM | 158 | H02 | GLN A 8  | 1.025  | 3.564  | -0.664 | H |
| ATOM | 159 | H03 | GLN A 8  | 0.705  | 4.215  | 1.667  | H |
| ATOM | 160 | H04 | GLN A 8  | -2.123 | 4.068  | 0.511  | H |
| ATOM | 161 | H05 | GLN A 8  | -3.134 | 6.217  | 3.302  | H |
| ATOM | 162 | H06 | GLN A 8  | -0.433 | 2.876  | 1.932  | H |
| ATOM | 163 | H07 | GLN A 8  | -1.008 | 5.442  | 0.389  | H |
| ATOM | 164 | N   | ASN A 9  | 0.988  | 0.882  | 1.243  | N |
| ATOM | 165 | CA  | ASN A 9  | 1.808  | -0.068 | 1.973  | C |
| ATOM | 166 | C   | ASN A 9  | 2.812  | -0.747 | 1.059  | C |
| ATOM | 167 | O   | ASN A 9  | 3.991  | -0.910 | 1.443  | O |
| ATOM | 168 | CB  | ASN A 9  | 0.915  | -1.115 | 2.638  | C |
| ATOM | 169 | CG  | ASN A 9  | 0.067  | -0.496 | 3.742  | C |
| ATOM | 170 | ND2 | ASN A 9  | -0.871 | -1.301 | 4.251  | N |
| ATOM | 171 | OD1 | ASN A 9  | 0.247  | 0.673  | 4.154  | O |
| ATOM | 172 | H   | ASN A 9  | -0.032 | 0.801  | 1.322  | H |
| ATOM | 173 | H01 | ASN A 9  | -0.994 | -2.269 | 3.948  | H |
| ATOM | 174 | H02 | ASN A 9  | 2.402  | 0.440  | 2.730  | H |
| ATOM | 175 | H03 | ASN A 9  | 1.542  | -1.897 | 3.081  | H |
| ATOM | 176 | H04 | ASN A 9  | -1.440 | -0.972 | 5.022  | H |
| ATOM | 177 | H05 | ASN A 9  | 0.284  | -1.572 | 1.868  | H |
| ATOM | 178 | N   | ARG A 10 | 2.378  | -1.178 | -0.139 | N |
| ATOM | 179 | CA  | ARG A 10 | 3.406  | -1.784 | -0.978 | C |
| ATOM | 180 | C   | ARG A 10 | 4.399  | -0.724 | -1.461 | C |
| ATOM | 181 | O   | ARG A 10 | 5.592  | -1.026 | -1.706 | O |
| ATOM | 182 | CB  | ARG A 10 | 2.909  | -2.662 | -2.144 | C |
| ATOM | 183 | CG  | ARG A 10 | 4.120  | -3.513 | -2.587 | C |
| ATOM | 184 | CD  | ARG A 10 | 3.878  | -4.459 | -3.766 | C |
| ATOM | 185 | NE  | ARG A 10 | 5.169  | -5.119 | -4.057 | N |
| ATOM | 186 | CZ  | ARG A 10 | 5.302  | -6.288 | -4.687 | C |
| ATOM | 187 | NH1 | ARG A 10 | 6.493  | -6.894 | -4.703 | N |
| ATOM | 188 | NH2 | ARG A 10 | 4.250  | -6.859 | -5.291 | N |
| ATOM | 189 | H   | ARG A 10 | 1.393  | -1.112 | -0.414 | H |
| ATOM | 190 | H01 | ARG A 10 | 4.298  | -7.803 | -5.653 | H |
| ATOM | 191 | H02 | ARG A 10 | 4.000  | -2.425 | -0.323 | H |
| ATOM | 192 | H03 | ARG A 10 | 2.530  | -2.039 | -2.961 | H |
| ATOM | 193 | H04 | ARG A 10 | 4.464  | -4.113 | -1.737 | H |

|      |     |              |       |        |        |   |
|------|-----|--------------|-------|--------|--------|---|
| ATOM | 194 | H05 ARG A 10 | 3.526 | -3.904 | -4.644 | H |
| ATOM | 195 | H06 ARG A 10 | 6.013 | -4.649 | -3.720 | H |
| ATOM | 196 | H07 ARG A 10 | 7.272 | -6.520 | -4.161 | H |
| ATOM | 197 | H08 ARG A 10 | 3.391 | -6.352 | -5.448 | H |
| ATOM | 198 | H09 ARG A 10 | 2.098 | -3.303 | -1.781 | H |
| ATOM | 199 | H10 ARG A 10 | 4.934 | -2.831 | -2.841 | H |
| ATOM | 200 | H11 ARG A 10 | 3.140 | -5.222 | -3.495 | H |
| ATOM | 201 | H12 ARG A 10 | 6.667 | -7.707 | -5.281 | H |
| ATOM | 202 | N ARG A 11   | 3.974 | 0.546  | -1.585 | N |
| ATOM | 203 | CA ARG A 11  | 5.019 | 1.534  | -1.855 | C |
| ATOM | 204 | C ARG A 11   | 6.044 | 1.525  | -0.700 | C |
| ATOM | 205 | O ARG A 11   | 7.278 | 1.550  | -0.909 | O |
| ATOM | 206 | CB ARG A 11  | 4.436 | 2.948  | -2.034 | C |
| ATOM | 207 | CG ARG A 11  | 5.556 | 3.886  | -2.531 | C |
| ATOM | 208 | CD ARG A 11  | 5.111 | 5.354  | -2.607 | C |
| ATOM | 209 | NE ARG A 11  | 6.234 | 6.173  | -3.124 | N |
| ATOM | 210 | CZ ARG A 11  | 6.112 | 7.409  | -3.620 | C |
| ATOM | 211 | NH1 ARG A 11 | 7.137 | 7.982  | -4.259 | N |
| ATOM | 212 | NH2 ARG A 11 | 4.959 | 8.075  | -3.486 | N |
| ATOM | 213 | H ARG A 11   | 2.987 | 0.809  | -1.525 | H |
| ATOM | 214 | H01 ARG A 11 | 4.788 | 8.937  | -3.990 | H |
| ATOM | 215 | H02 ARG A 11 | 5.586 | 1.239  | -2.742 | H |
| ATOM | 216 | H03 ARG A 11 | 4.013 | 3.270  | -1.078 | H |
| ATOM | 217 | H04 ARG A 11 | 5.868 | 3.563  | -3.530 | H |
| ATOM | 218 | H05 ARG A 11 | 4.818 | 5.705  | -1.610 | H |
| ATOM | 219 | H06 ARG A 11 | 7.159 | 5.760  | -3.069 | H |
| ATOM | 220 | H07 ARG A 11 | 7.950 | 7.453  | -4.547 | H |
| ATOM | 221 | H08 ARG A 11 | 4.244 | 7.768  | -2.841 | H |
| ATOM | 222 | H09 ARG A 11 | 3.625 | 2.905  | -2.771 | H |
| ATOM | 223 | H10 ARG A 11 | 6.422 | 3.796  | -1.864 | H |
| ATOM | 224 | H11 ARG A 11 | 4.264 | 5.450  | -3.295 | H |
| ATOM | 225 | H12 ARG A 11 | 7.136 | 8.970  | -4.487 | H |
| ATOM | 226 | N LYS A 12   | 5.511 | 1.541  | 0.533  | N |
| ATOM | 227 | CA LYS A 12  | 6.378 | 1.563  | 1.719  | C |
| ATOM | 228 | C LYS A 12   | 7.358 | 0.374  | 1.704  | C |
| ATOM | 229 | O LYS A 12   | 8.555 | 0.521  | 2.017  | O |
| ATOM | 230 | CB LYS A 12  | 5.501 | 1.502  | 2.991  | C |
| ATOM | 231 | CG LYS A 12  | 4.637 | 2.771  | 3.156  | C |
| ATOM | 232 | CD LYS A 12  | 3.456 | 2.577  | 4.145  | C |
| ATOM | 233 | CE LYS A 12  | 2.334 | 3.556  | 3.775  | C |
| ATOM | 234 | NZ LYS A 12  | 0.996 | 3.211  | 4.416  | N |
| ATOM | 235 | H LYS A 12   | 4.494 | 1.540  | 0.652  | H |
| ATOM | 236 | H01 LYS A 12 | 0.749 | 2.191  | 4.238  | H |
| ATOM | 237 | H02 LYS A 12 | 7.005 | 2.458  | 1.718  | H |
| ATOM | 238 | H03 LYS A 12 | 6.153 | 1.368  | 3.860  | H |
| ATOM | 239 | H04 LYS A 12 | 4.215 | 3.022  | 2.180  | H |
| ATOM | 240 | H05 LYS A 12 | 3.781 | 2.710  | 5.181  | H |
| ATOM | 241 | H06 LYS A 12 | 2.176 | 3.491  | 2.700  | H |
| ATOM | 242 | H07 LYS A 12 | 0.221 | 3.812  | 4.019  | H |
| ATOM | 243 | H08 LYS A 12 | 4.861 | 0.620  | 2.894  | H |
| ATOM | 244 | H09 LYS A 12 | 5.263 | 3.609  | 3.481  | H |
| ATOM | 245 | H10 LYS A 12 | 3.067 | 1.560  | 4.043  | H |
| ATOM | 246 | H11 LYS A 12 | 2.581 | 4.585  | 4.046  | H |
| ATOM | 247 | H12 LYS A 12 | 1.032 | 3.352  | 5.433  | H |
| ATOM | 248 | N TRP A 13   | 6.784 | -0.788 | 1.341  | N |
| ATOM | 249 | CA TRP A 13  | 7.494 | -2.060 | 1.211  | C |
| ATOM | 250 | C TRP A 13   | 8.759 | -1.954 | 0.382  | C |
| ATOM | 251 | O TRP A 13   | 9.683 | -2.773 | 0.485  | O |
| ATOM | 252 | CB TRP A 13  | 6.518 | -3.046 | 0.497  | C |
| ATOM | 253 | CG TRP A 13  | 7.193 | -4.243 | -0.096 | C |
| ATOM | 254 | CD1 TRP A 13 | 7.537 | -5.422 | 0.507  | C |
| ATOM | 255 | CD2 TRP A 13 | 7.713 | -4.305 | -1.442 | C |
| ATOM | 256 | CE2 TRP A 13 | 8.369 | -5.560 | -1.583 | C |
| ATOM | 257 | CE3 TRP A 13 | 7.694 | -3.402 | -2.516 | C |
| ATOM | 258 | NE1 TRP A 13 | 8.238 | -6.224 | -0.387 | N |
| ATOM | 259 | CZ2 TRP A 13 | 9.009 | -5.918 | -2.776 | C |

|         |     |           |     |        |        |        |   |
|---------|-----|-----------|-----|--------|--------|--------|---|
| ATOM    | 260 | CZ3 TRP A | 13  | 8.316  | -3.768 | -3.706 | C |
| ATOM    | 261 | CH2 TRP A | 13  | 8.976  | -5.011 | -3.831 | C |
| ATOM    | 262 | H TRP A   | 13  | 5.771  | -0.810 | 1.195  | H |
| ATOM    | 263 | H01 TRP A | 13  | 9.475  | -5.258 | -4.762 | H |
| ATOM    | 264 | H02 TRP A | 13  | 7.808  | -2.459 | 2.179  | H |
| ATOM    | 265 | H03 TRP A | 13  | 6.076  | -2.468 | -0.316 | H |
| ATOM    | 266 | H04 TRP A | 13  | 7.356  | -5.754 | 1.516  | H |
| ATOM    | 267 | H05 TRP A | 13  | 7.219  | -2.434 | -2.401 | H |
| ATOM    | 268 | H06 TRP A | 13  | 8.623  | -7.131 | -0.166 | H |
| ATOM    | 269 | H07 TRP A | 13  | 9.540  | -6.858 | -2.868 | H |
| ATOM    | 270 | H08 TRP A | 13  | 8.311  | -3.086 | -4.549 | H |
| ATOM    | 271 | H09 TRP A | 13  | 5.732  | -3.329 | 1.204  | H |
| ATOM    | 272 | N LYS A   | 14  | 8.822  | -0.938 | -0.520 | N |
| ATOM    | 273 | CA LYS A  | 14  | 10.066 | -0.860 | -1.257 | C |
| ATOM    | 274 | C LYS A   | 14  | 11.242 | -0.759 | -0.278 | C |
| ATOM    | 275 | O LYS A   | 14  | 12.393 | -1.200 | -0.589 | O |
| ATOM    | 276 | CB LYS A  | 14  | 10.070 | 0.309  | -2.277 | C |
| ATOM    | 277 | CG LYS A  | 14  | 10.416 | -0.158 | -3.704 | C |
| ATOM    | 278 | CD LYS A  | 14  | 11.825 | -0.802 | -3.829 | C |
| ATOM    | 279 | CE LYS A  | 14  | 11.830 | -2.348 | -3.685 | C |
| ATOM    | 280 | NZ LYS A  | 14  | 12.769 | -2.778 | -2.563 | N |
| ATOM    | 281 | H LYS A   | 14  | 8.110  | -0.217 | -0.629 | H |
| ATOM    | 282 | H01 LYS A | 14  | 12.618 | -3.760 | -2.303 | H |
| ATOM    | 283 | H02 LYS A | 14  | 10.207 | -1.816 | -1.765 | H |
| ATOM    | 284 | H03 LYS A | 14  | 10.793 | 1.070  | -1.963 | H |
| ATOM    | 285 | H04 LYS A | 14  | 10.373 | 0.710  | -4.369 | H |
| ATOM    | 286 | H05 LYS A | 14  | 12.476 | -0.364 | -3.065 | H |
| ATOM    | 287 | H06 LYS A | 14  | 12.162 | -2.837 | -4.603 | H |
| ATOM    | 288 | H07 LYS A | 14  | 12.584 | -2.114 | -1.667 | H |
| ATOM    | 289 | H08 LYS A | 14  | 9.085  | 0.785  | -2.265 | H |
| ATOM    | 290 | H09 LYS A | 14  | 9.653  | -0.865 | -4.052 | H |
| ATOM    | 291 | H10 LYS A | 14  | 12.254 | -0.544 | -4.801 | H |
| ATOM    | 292 | H11 LYS A | 14  | 10.843 | -2.735 | -3.426 | H |
| ATOM    | 293 | H12 LYS A | 14  | 13.750 | -2.661 | -2.846 | H |
| ATOM    | 294 | N LYS A   | 15  | 11.030 | -0.161 | 0.887  | N |
| ATOM    | 295 | CA LYS A  | 15  | 12.045 | -0.263 | 1.949  | C |
| ATOM    | 296 | C LYS A   | 15  | 11.304 | -0.271 | 3.281  | C |
| ATOM    | 297 | O LYS A   | 15  | 11.488 | 0.506  | 4.205  | O |
| ATOM    | 298 | CB LYS A  | 15  | 13.088 | 0.861  | 1.905  | C |
| ATOM    | 299 | CG LYS A  | 15  | 14.225 | 0.584  | 2.913  | C |
| ATOM    | 300 | CD LYS A  | 15  | 15.308 | 1.688  | 2.907  | C |
| ATOM    | 301 | CE LYS A  | 15  | 16.355 | 1.355  | 3.976  | C |
| ATOM    | 302 | NZ LYS A  | 15  | 17.462 | 2.436  | 4.040  | N |
| ATOM    | 303 | H LYS A   | 15  | 10.076 | 0.118  | 1.173  | H |
| ATOM    | 304 | H01 LYS A | 15  | 18.162 | 2.203  | 4.763  | H |
| ATOM    | 305 | H02 LYS A | 15  | 12.539 | -1.233 | 1.824  | H |
| ATOM    | 306 | H04 LYS A | 15  | 12.600 | 1.810  | 2.144  | H |
| ATOM    | 307 | H05 LYS A | 15  | 14.690 | -0.381 | 2.677  | H |
| ATOM    | 308 | H06 LYS A | 15  | 14.836 | 2.653  | 3.129  | H |
| ATOM    | 309 | H07 LYS A | 15  | 16.865 | 0.413  | 3.763  | H |
| ATOM    | 310 | H08 LYS A | 15  | 17.054 | 3.356  | 4.268  | H |
| ATOM    | 311 | H09 LYS A | 15  | 13.490 | 0.902  | 0.888  | H |
| ATOM    | 312 | H10 LYS A | 15  | 13.779 | 0.526  | 3.909  | H |
| ATOM    | 313 | H11 LYS A | 15  | 15.777 | 1.743  | 1.917  | H |
| ATOM    | 314 | H12 LYS A | 15  | 15.910 | 1.318  | 4.972  | H |
| ATOM    | 315 | H13 LYS A | 15  | 17.947 | 2.512  | 3.132  | H |
| TER     | 316 | LYS A     | 15  |        |        |        |   |
| HETATM  | 317 | O         | 0   | 10.411 | -1.294 | 3.318  | O |
| HETATM  | 318 | H         | 0   | 9.908  | -1.265 | 4.168  | H |
| END     |     |           |     |        |        |        |   |
| CONNECT | 296 | 317       |     |        |        |        |   |
| CONNECT | 317 | 296       | 318 |        |        |        |   |
| CONNECT | 318 | 317       |     |        |        |        |   |

# TITLE Trp56aGlyPen

REMARK Created by GaussView 6.1.1: E= -6682.6460495 a.u.

|      |    |     |       |   |         |        |        |   |
|------|----|-----|-------|---|---------|--------|--------|---|
| ATOM | 1  | N   | ARG A | 1 | -10.525 | -1.430 | -2.573 | N |
| ATOM | 2  | CA  | ARG A | 1 | -11.220 | -1.197 | -1.266 | C |
| ATOM | 3  | C   | ARG A | 1 | -10.042 | -1.186 | -0.283 | C |
| ATOM | 4  | O   | ARG A | 1 | -9.519  | -0.127 | 0.120  | O |
| ATOM | 5  | CB  | ARG A | 1 | -12.331 | -2.238 | -1.046 | C |
| ATOM | 6  | CG  | ARG A | 1 | -13.181 | -2.052 | 0.228  | C |
| ATOM | 7  | CD  | ARG A | 1 | -14.356 | -3.053 | 0.196  | C |
| ATOM | 8  | NE  | ARG A | 1 | -15.240 | -2.893 | 1.369  | N |
| ATOM | 9  | CZ  | ARG A | 1 | -16.506 | -3.343 | 1.413  | C |
| ATOM | 10 | NH1 | ARG A | 1 | -17.307 | -2.984 | 2.421  | N |
| ATOM | 11 | NH2 | ARG A | 1 | -16.971 | -4.141 | 0.449  | N |
| ATOM | 12 | H   | ARG A | 1 | -10.766 | -0.738 | -3.282 | H |
| ATOM | 13 | H01 | ARG A | 1 | -17.961 | -4.346 | 0.367  | H |
| ATOM | 14 | H02 | ARG A | 1 | -10.681 | -2.372 | -2.938 | H |
| ATOM | 15 | H03 | ARG A | 1 | -11.639 | -0.189 | -1.260 | H |
| ATOM | 16 | H04 | ARG A | 1 | -11.905 | -3.250 | -1.052 | H |
| ATOM | 17 | H05 | ARG A | 1 | -13.581 | -1.033 | 0.264  | H |
| ATOM | 18 | H06 | ARG A | 1 | -13.963 | -4.077 | 0.158  | H |
| ATOM | 19 | H07 | ARG A | 1 | -14.844 | -2.481 | 2.206  | H |
| ATOM | 20 | H08 | ARG A | 1 | -17.067 | -2.234 | 3.056  | H |
| ATOM | 21 | H09 | ARG A | 1 | -16.357 | -4.619 | -0.198 | H |
| ATOM | 22 | H10 | ARG A | 1 | -12.989 | -2.172 | -1.921 | H |
| ATOM | 23 | H11 | ARG A | 1 | -12.564 | -2.222 | 1.119  | H |
| ATOM | 24 | H12 | ARG A | 1 | -14.952 | -2.868 | -0.704 | H |
| ATOM | 25 | H13 | ARG A | 1 | -18.196 | -3.444 | 2.580  | H |
| ATOM | 26 | N   | GLN A | 2 | -9.470  | -2.403 | -0.100 | N |
| ATOM | 27 | CA  | GLN A | 2 | -8.097  | -2.526 | 0.370  | C |
| ATOM | 28 | C   | GLN A | 2 | -7.107  | -1.890 | -0.608 | C |
| ATOM | 29 | O   | GLN A | 2 | -5.896  | -1.824 | -0.263 | O |
| ATOM | 30 | CB  | GLN A | 2 | -7.680  | -3.980 | 0.603  | C |
| ATOM | 31 | CG  | GLN A | 2 | -8.381  | -4.678 | 1.776  | C |
| ATOM | 32 | CD  | GLN A | 2 | -7.381  | -5.669 | 2.404  | C |
| ATOM | 33 | NE2 | GLN A | 2 | -7.923  | -6.743 | 3.008  | N |
| ATOM | 34 | OE1 | GLN A | 2 | -6.161  | -5.439 | 2.367  | O |
| ATOM | 35 | H   | GLN A | 2 | -9.908  | -3.238 | -0.467 | H |
| ATOM | 36 | H01 | GLN A | 2 | -8.915  | -6.934 | 3.011  | H |
| ATOM | 37 | H02 | GLN A | 2 | -7.984  | -1.966 | 1.305  | H |
| ATOM | 38 | H03 | GLN A | 2 | -6.613  | -3.978 | 0.846  | H |
| ATOM | 39 | H04 | GLN A | 2 | -9.303  | -5.183 | 1.478  | H |
| ATOM | 40 | H05 | GLN A | 2 | -7.311  | -7.406 | 3.468  | H |
| ATOM | 41 | H06 | GLN A | 2 | -7.805  | -4.555 | -0.322 | H |
| ATOM | 42 | H07 | GLN A | 2 | -8.624  | -3.945 | 2.557  | H |
| ATOM | 43 | N   | ILE A | 3 | -7.554  | -1.350 | -1.747 | N |
| ATOM | 44 | CA  | ILE A | 3 | -6.615  | -0.549 | -2.535 | C |
| ATOM | 45 | C   | ILE A | 3 | -5.973  | 0.525  | -1.664 | C |
| ATOM | 46 | O   | ILE A | 3 | -4.840  | 0.970  | -1.936 | O |
| ATOM | 47 | CB  | ILE A | 3 | -7.300  | 0.116  | -3.754 | C |
| ATOM | 48 | CG1 | ILE A | 3 | -8.381  | 1.128  | -3.304 | C |
| ATOM | 49 | CG2 | ILE A | 3 | -7.825  | -0.967 | -4.714 | C |
| ATOM | 50 | CD  | ILE A | 3 | -9.210  | 1.682  | -4.475 | C |
| ATOM | 51 | H   | ILE A | 3 | -8.534  | -1.439 | -2.067 | H |
| ATOM | 52 | H01 | ILE A | 3 | -9.877  | 2.479  | -4.133 | H |
| ATOM | 53 | H02 | ILE A | 3 | -5.795  | -1.177 | -2.892 | H |
| ATOM | 54 | H03 | ILE A | 3 | -6.506  | 0.672  | -4.268 | H |
| ATOM | 55 | H04 | ILE A | 3 | -7.886  | 1.962  | -2.797 | H |
| ATOM | 56 | H05 | ILE A | 3 | -7.041  | -1.697 | -4.936 | H |
| ATOM | 57 | H06 | ILE A | 3 | -9.824  | 0.904  | -4.940 | H |
| ATOM | 58 | H07 | ILE A | 3 | -9.041  | 0.656  | -2.568 | H |
| ATOM | 59 | H08 | ILE A | 3 | -8.138  | -0.521 | -5.661 | H |
| ATOM | 60 | H09 | ILE A | 3 | -8.559  | 2.099  | -5.250 | H |
| ATOM | 61 | H10 | ILE A | 3 | -8.679  | -1.494 | -4.282 | H |
| ATOM | 62 | N   | LYS A | 4 | -6.691  | 1.006  | -0.620 | N |
| ATOM | 63 | CA  | LYS A | 4 | -6.067  | 2.041  | 0.200  | C |
| ATOM | 64 | C   | LYS A | 4 | -4.848  | 1.486  | 0.956  | C |

|      |     |     |     |   |   |         |        |        |   |
|------|-----|-----|-----|---|---|---------|--------|--------|---|
| ATOM | 65  | O   | LYS | A | 4 | -3.850  | 2.208  | 1.198  | O |
| ATOM | 66  | CB  | LYS | A | 4 | -7.079  | 2.642  | 1.189  | C |
| ATOM | 67  | CG  | LYS | A | 4 | -8.272  | 3.310  | 0.461  | C |
| ATOM | 68  | CD  | LYS | A | 4 | -8.948  | 4.371  | 1.364  | C |
| ATOM | 69  | CE  | LYS | A | 4 | -10.065 | 5.091  | 0.601  | C |
| ATOM | 70  | NZ  | LYS | A | 4 | -10.663 | 6.241  | 1.449  | N |
| ATOM | 71  | H   | LYS | A | 4 | -7.626  | 0.651  | -0.402 | H |
| ATOM | 72  | H01 | LYS | A | 4 | -9.935  | 6.936  | 1.681  | H |
| ATOM | 73  | H02 | LYS | A | 4 | -5.673  | 2.828  | -0.449 | H |
| ATOM | 74  | H03 | LYS | A | 4 | -6.537  | 3.386  | 1.783  | H |
| ATOM | 75  | H04 | LYS | A | 4 | -8.996  | 2.540  | 0.169  | H |
| ATOM | 76  | H05 | LYS | A | 4 | -8.188  | 5.099  | 1.674  | H |
| ATOM | 77  | H06 | LYS | A | 4 | -10.896 | 4.424  | 0.363  | H |
| ATOM | 78  | H07 | LYS | A | 4 | -11.054 | 5.879  | 2.334  | H |
| ATOM | 79  | H08 | LYS | A | 4 | -7.438  | 1.859  | 1.866  | H |
| ATOM | 80  | H09 | LYS | A | 4 | -7.906  | 3.800  | -0.449 | H |
| ATOM | 81  | H10 | LYS | A | 4 | -9.351  | 3.888  | 2.262  | H |
| ATOM | 82  | H11 | LYS | A | 4 | -9.691  | 5.558  | -0.313 | H |
| ATOM | 83  | H12 | LYS | A | 4 | -11.418 | 6.727  | 0.936  | H |
| ATOM | 84  | N   | ILE | A | 5 | -4.952  | 0.214  | 1.363  | N |
| ATOM | 85  | CA  | ILE | A | 5 | -3.810  | -0.466 | 1.974  | C |
| ATOM | 86  | C   | ILE | A | 5 | -2.743  | -0.689 | 0.912  | C |
| ATOM | 87  | O   | ILE | A | 5 | -1.522  | -0.584 | 1.174  | O |
| ATOM | 88  | CB  | ILE | A | 5 | -4.227  | -1.805 | 2.626  | C |
| ATOM | 89  | CG1 | ILE | A | 5 | -5.377  | -1.550 | 3.624  | C |
| ATOM | 90  | CG2 | ILE | A | 5 | -3.004  | -2.419 | 3.333  | C |
| ATOM | 91  | CD  | ILE | A | 5 | -5.803  | -2.827 | 4.368  | C |
| ATOM | 92  | H   | ILE | A | 5 | -5.673  | -0.393 | 0.976  | H |
| ATOM | 93  | H01 | ILE | A | 5 | -5.921  | -3.661 | 3.668  | H |
| ATOM | 94  | H02 | ILE | A | 5 | -3.378  | 0.172  | 2.743  | H |
| ATOM | 95  | H03 | ILE | A | 5 | -4.587  | -2.473 | 1.836  | H |
| ATOM | 96  | H04 | ILE | A | 5 | -6.240  | -1.146 | 3.079  | H |
| ATOM | 97  | H05 | ILE | A | 5 | -3.245  | -3.423 | 3.690  | H |
| ATOM | 98  | H06 | ILE | A | 5 | -6.749  | -2.666 | 4.897  | H |
| ATOM | 99  | H07 | ILE | A | 5 | -5.054  | -0.779 | 4.336  | H |
| ATOM | 100 | H08 | ILE | A | 5 | -2.719  | -1.796 | 4.188  | H |
| ATOM | 101 | H09 | ILE | A | 5 | -5.056  | -3.116 | 5.112  | H |
| ATOM | 102 | H10 | ILE | A | 5 | -2.133  | -2.484 | 2.675  | H |
| ATOM | 103 | N   | TRP | A | 6 | -3.175  | -1.016 | -0.311 | N |
| ATOM | 104 | CA  | TRP | A | 6 | -2.184  | -1.196 | -1.368 | C |
| ATOM | 105 | C   | TRP | A | 6 | -1.370  | 0.090  | -1.548 | C |
| ATOM | 106 | O   | TRP | A | 6 | -0.129  | 0.081  | -1.698 | O |
| ATOM | 107 | CB  | TRP | A | 6 | -2.880  | -1.585 | -2.692 | C |
| ATOM | 108 | CG  | TRP | A | 6 | -1.870  | -2.172 | -3.622 | C |
| ATOM | 109 | CD1 | TRP | A | 6 | -1.332  | -1.645 | -4.765 | C |
| ATOM | 110 | CD2 | TRP | A | 6 | -1.202  | -3.430 | -3.386 | C |
| ATOM | 111 | CE2 | TRP | A | 6 | -0.256  | -3.602 | -4.426 | C |
| ATOM | 112 | CE3 | TRP | A | 6 | -1.352  | -4.426 | -2.410 | C |
| ATOM | 113 | NE1 | TRP | A | 6 | -0.356  | -2.502 | -5.256 | N |
| ATOM | 114 | CZ2 | TRP | A | 6 | 0.561   | -4.734 | -4.487 | C |
| ATOM | 115 | CZ3 | TRP | A | 6 | -0.536  | -5.547 | -2.470 | C |
| ATOM | 116 | CH2 | TRP | A | 6 | 0.418   | -5.692 | -3.498 | C |
| ATOM | 117 | H   | TRP | A | 6 | -4.160  | -1.235 | -0.486 | H |
| ATOM | 118 | H01 | TRP | A | 6 | 1.028   | -6.585 | -3.530 | H |
| ATOM | 119 | H02 | TRP | A | 6 | -1.478  | -1.975 | -1.077 | H |
| ATOM | 120 | H03 | TRP | A | 6 | -3.381  | -0.704 | -3.103 | H |
| ATOM | 121 | H04 | TRP | A | 6 | -1.573  | -0.726 | -5.273 | H |
| ATOM | 122 | H05 | TRP | A | 6 | -2.122  | -4.341 | -1.650 | H |
| ATOM | 123 | H06 | TRP | A | 6 | 0.144   | -2.380 | -6.124 | H |
| ATOM | 124 | H07 | TRP | A | 6 | 1.274   | -4.871 | -5.290 | H |
| ATOM | 125 | H08 | TRP | A | 6 | -0.656  | -6.345 | -1.747 | H |
| ATOM | 126 | H09 | TRP | A | 6 | -3.648  | -2.336 | -2.460 | H |
| ATOM | 127 | N   | PHE | A | 7 | -2.089  | 1.226  | -1.527 | N |
| ATOM | 128 | CA  | PHE | A | 7 | -1.413  | 2.522  | -1.572 | C |
| ATOM | 129 | C   | PHE | A | 7 | -0.387  | 2.611  | -0.438 | C |
| ATOM | 130 | O   | PHE | A | 7 | 0.797   | 2.958  | -0.622 | O |

|      |     |     |     |   |    |        |        |        |   |
|------|-----|-----|-----|---|----|--------|--------|--------|---|
| ATOM | 131 | CB  | PHE | A | 7  | -2.474 | 3.635  | -1.410 | C |
| ATOM | 132 | CG  | PHE | A | 7  | -1.824 | 4.997  | -1.331 | C |
| ATOM | 133 | CD1 | PHE | A | 7  | -1.552 | 5.727  | -2.490 | C |
| ATOM | 134 | CD2 | PHE | A | 7  | -1.452 | 5.526  | -0.092 | C |
| ATOM | 135 | CE1 | PHE | A | 7  | -0.925 | 6.967  | -2.413 | C |
| ATOM | 136 | CE2 | PHE | A | 7  | -0.820 | 6.764  | -0.014 | C |
| ATOM | 137 | CZ  | PHE | A | 7  | -0.556 | 7.488  | -1.175 | C |
| ATOM | 138 | H   | PHE | A | 7  | -3.114 | 1.195  | -1.524 | H |
| ATOM | 139 | H01 | PHE | A | 7  | -0.085 | 8.462  | -1.115 | H |
| ATOM | 140 | H02 | PHE | A | 7  | -0.854 | 2.653  | -2.501 | H |
| ATOM | 141 | H03 | PHE | A | 7  | -3.046 | 3.428  | -0.500 | H |
| ATOM | 142 | H04 | PHE | A | 7  | -1.853 | 5.331  | -3.454 | H |
| ATOM | 143 | H05 | PHE | A | 7  | -1.668 | 4.966  | 0.810  | H |
| ATOM | 144 | H06 | PHE | A | 7  | -0.742 | 7.539  | -3.315 | H |
| ATOM | 145 | H07 | PHE | A | 7  | -0.553 | 7.175  | 0.953  | H |
| ATOM | 146 | H08 | PHE | A | 7  | -3.159 | 3.580  | -2.263 | H |
| ATOM | 147 | N   | GLN | A | 8  | -0.871 | 2.285  | 0.780  | N |
| ATOM | 148 | CA  | GLN | A | 8  | 0.037  | 2.272  | 1.920  | C |
| ATOM | 149 | C   | GLN | A | 8  | 1.276  | 1.431  | 1.586  | C |
| ATOM | 150 | O   | GLN | A | 8  | 2.426  | 1.766  | 1.964  | O |
| ATOM | 151 | CB  | GLN | A | 8  | -0.568 | 1.551  | 3.132  | C |
| ATOM | 152 | CG  | GLN | A | 8  | -1.825 | 2.103  | 3.796  | C |
| ATOM | 153 | CD  | GLN | A | 8  | -2.226 | 1.091  | 4.872  | C |
| ATOM | 154 | NE2 | GLN | A | 8  | -3.405 | 1.316  | 5.482  | N |
| ATOM | 155 | OE1 | GLN | A | 8  | -1.521 | 0.097  | 5.164  | O |
| ATOM | 156 | H   | GLN | A | 8  | -1.854 | 2.038  | 0.905  | H |
| ATOM | 157 | H01 | GLN | A | 8  | -3.958 | 2.139  | 5.290  | H |
| ATOM | 158 | H02 | GLN | A | 8  | 0.380  | 3.280  | 2.166  | H |
| ATOM | 159 | H03 | GLN | A | 8  | 0.210  | 1.525  | 3.895  | H |
| ATOM | 160 | H04 | GLN | A | 8  | -2.642 | 2.221  | 3.075  | H |
| ATOM | 161 | H05 | GLN | A | 8  | -3.692 | 0.705  | 6.238  | H |
| ATOM | 162 | H06 | GLN | A | 8  | -0.788 | 0.531  | 2.813  | H |
| ATOM | 163 | H07 | GLN | A | 8  | -1.640 | 3.075  | 4.270  | H |
| ATOM | 164 | N   | ASN | A | 9  | 1.013  | 0.268  | 0.990  | N |
| ATOM | 165 | CA  | ASN | A | 9  | 2.083  | -0.665 | 0.675  | C |
| ATOM | 166 | C   | ASN | A | 9  | 3.111  | -0.008 | -0.235 | C |
| ATOM | 167 | O   | ASN | A | 9  | 4.333  | -0.133 | -0.010 | O |
| ATOM | 168 | CB  | ASN | A | 9  | 1.492  | -1.907 | 0.012  | C |
| ATOM | 169 | CG  | ASN | A | 9  | 0.634  | -2.694 | 0.990  | C |
| ATOM | 170 | ND2 | ASN | A | 9  | -0.063 | -3.698 | 0.436  | N |
| ATOM | 171 | OD1 | ASN | A | 9  | 0.589  | -2.453 | 2.216  | O |
| ATOM | 172 | H   | ASN | A | 9  | 0.043  | -0.022 | 0.816  | H |
| ATOM | 173 | H01 | ASN | A | 9  | -0.014 | -3.930 | -0.554 | H |
| ATOM | 174 | H02 | ASN | A | 9  | 2.626  | -0.947 | 1.575  | H |
| ATOM | 175 | H03 | ASN | A | 9  | 2.302  | -2.555 | -0.340 | H |
| ATOM | 176 | H04 | ASN | A | 9  | -0.621 | -4.294 | 1.037  | H |
| ATOM | 177 | H05 | ASN | A | 9  | 0.893  | -1.589 | -0.848 | H |
| ATOM | 178 | N   | ARG | A | 10 | 2.629  | 0.699  | -1.268 | N |
| ATOM | 179 | CA  | ARG | A | 10 | 3.588  | 1.418  | -2.100 | C |
| ATOM | 180 | C   | ARG | A | 10 | 4.381  | 2.431  | -1.260 | C |
| ATOM | 181 | O   | ARG | A | 10 | 5.585  | 2.674  | -1.468 | O |
| ATOM | 182 | CB  | ARG | A | 10 | 2.875  | 2.172  | -3.242 | C |
| ATOM | 183 | CG  | ARG | A | 10 | 3.941  | 2.716  | -4.216 | C |
| ATOM | 184 | CD  | ARG | A | 10 | 3.369  | 3.691  | -5.256 | C |
| ATOM | 185 | NE  | ARG | A | 10 | 4.469  | 4.136  | -6.144 | N |
| ATOM | 186 | CZ  | ARG | A | 10 | 4.299  | 4.730  | -7.329 | C |
| ATOM | 187 | NH1 | ARG | A | 10 | 5.341  | 4.908  | -8.149 | N |
| ATOM | 188 | NH2 | ARG | A | 10 | 3.083  | 5.143  | -7.705 | N |
| ATOM | 189 | H   | ARG | A | 10 | 1.620  | 0.742  | -1.450 | H |
| ATOM | 190 | H01 | ARG | A | 10 | 2.899  | 5.448  | -8.653 | H |
| ATOM | 191 | H02 | ARG | A | 10 | 4.329  | 0.724  | -2.506 | H |
| ATOM | 192 | H03 | ARG | A | 10 | 2.264  | 2.966  | -2.797 | H |
| ATOM | 193 | H04 | ARG | A | 10 | 4.400  | 1.872  | -4.741 | H |
| ATOM | 194 | H05 | ARG | A | 10 | 2.921  | 4.554  | -4.749 | H |
| ATOM | 195 | H06 | ARG | A | 10 | 5.413  | 3.987  | -5.805 | H |
| ATOM | 196 | H07 | ARG | A | 10 | 6.232  | 4.455  | -7.985 | H |

|      |     |              |        |        |        |   |
|------|-----|--------------|--------|--------|--------|---|
| ATOM | 197 | H08 ARG A 10 | 2.319  | 5.203  | -7.046 | H |
| ATOM | 198 | H09 ARG A 10 | 2.208  | 1.476  | -3.762 | H |
| ATOM | 199 | H10 ARG A 10 | 4.727  | 3.213  | -3.637 | H |
| ATOM | 200 | H11 ARG A 10 | 2.610  | 3.188  | -5.865 | H |
| ATOM | 201 | H12 ARG A 10 | 5.278  | 5.499  | -8.969 | H |
| ATOM | 202 | N ARG A 11   | 3.657  | 3.090  | -0.328 | N |
| ATOM | 203 | CA ARG A 11  | 4.347  | 4.052  | 0.517  | C |
| ATOM | 204 | C ARG A 11   | 5.431  | 3.385  | 1.373  | C |
| ATOM | 205 | O ARG A 11   | 6.470  | 4.007  | 1.709  | O |
| ATOM | 206 | CB ARG A 11  | 3.335  | 4.763  | 1.441  | C |
| ATOM | 207 | CG ARG A 11  | 4.011  | 5.792  | 2.366  | C |
| ATOM | 208 | CD ARG A 11  | 4.625  | 6.956  | 1.567  | C |
| ATOM | 209 | NE ARG A 11  | 5.521  | 7.797  | 2.377  | N |
| ATOM | 210 | CZ ARG A 11  | 6.850  | 7.613  | 2.433  | C |
| ATOM | 211 | NH1 ARG A 11 | 7.611  | 8.589  | 2.961  | N |
| ATOM | 212 | NH2 ARG A 11 | 7.410  | 6.505  | 1.959  | N |
| ATOM | 213 | H ARG A 11   | 2.645  | 2.965  | -0.246 | H |
| ATOM | 214 | H01 ARG A 11 | 8.413  | 6.487  | 1.816  | H |
| ATOM | 215 | H02 ARG A 11 | 4.885  | 4.761  | -0.117 | H |
| ATOM | 216 | H03 ARG A 11 | 2.852  | 3.981  | 2.032  | H |
| ATOM | 217 | H04 ARG A 11 | 4.799  | 5.306  | 2.946  | H |
| ATOM | 218 | H05 ARG A 11 | 3.837  | 7.598  | 1.164  | H |
| ATOM | 219 | H06 ARG A 11 | 5.109  | 8.541  | 2.927  | H |
| ATOM | 220 | H07 ARG A 11 | 7.251  | 9.524  | 3.107  | H |
| ATOM | 221 | H08 ARG A 11 | 6.918  | 5.590  | 1.797  | H |
| ATOM | 222 | H09 ARG A 11 | 2.570  | 5.243  | 0.819  | H |
| ATOM | 223 | H10 ARG A 11 | 3.274  | 6.187  | 3.073  | H |
| ATOM | 224 | H11 ARG A 11 | 5.213  | 6.583  | 0.727  | H |
| ATOM | 225 | H12 ARG A 11 | 8.578  | 8.429  | 3.207  | H |
| ATOM | 226 | N LYS A 12   | 5.172  | 2.143  | 1.789  | N |
| ATOM | 227 | CA LYS A 12  | 6.174  | 1.356  | 2.519  | C |
| ATOM | 228 | C LYS A 12   | 7.374  | 1.096  | 1.586  | C |
| ATOM | 229 | O LYS A 12   | 8.543  | 1.321  | 1.927  | O |
| ATOM | 230 | CB LYS A 12  | 5.520  | 0.043  | 3.001  | C |
| ATOM | 231 | CG LYS A 12  | 4.423  | 0.332  | 4.051  | C |
| ATOM | 232 | CD LYS A 12  | 3.403  | -0.827 | 4.224  | C |
| ATOM | 233 | CE LYS A 12  | 2.064  | -0.224 | 4.673  | C |
| ATOM | 234 | NZ LYS A 12  | 0.880  | -1.172 | 4.537  | N |
| ATOM | 235 | H LYS A 12   | 4.255  | 1.735  | 1.594  | H |
| ATOM | 236 | H01 LYS A 12 | -0.025 | -0.664 | 4.750  | H |
| ATOM | 237 | H02 LYS A 12 | 6.565  | 1.937  | 3.358  | H |
| ATOM | 238 | H03 LYS A 12 | 6.291  | -0.615 | 3.413  | H |
| ATOM | 239 | H04 LYS A 12 | 3.871  | 1.213  | 3.712  | H |
| ATOM | 240 | H05 LYS A 12 | 3.767  | -1.577 | 4.932  | H |
| ATOM | 241 | H06 LYS A 12 | 1.851  | 0.618  | 4.019  | H |
| ATOM | 242 | H07 LYS A 12 | 0.968  | -1.961 | 5.190  | H |
| ATOM | 243 | H08 LYS A 12 | 5.079  | -0.443 | 2.125  | H |
| ATOM | 244 | H09 LYS A 12 | 4.882  | 0.574  | 5.015  | H |
| ATOM | 245 | H10 LYS A 12 | 3.253  | -1.318 | 3.259  | H |
| ATOM | 246 | H11 LYS A 12 | 2.099  | 0.119  | 5.709  | H |
| ATOM | 247 | H12 LYS A 12 | 0.818  | -1.577 | 3.554  | H |
| ATOM | 248 | N GLY A 13   | 6.985  | 0.597  | 0.378  | N |
| ATOM | 249 | C GLY A 13   | 8.925  | -0.090 | -0.977 | C |
| ATOM | 250 | O GLY A 13   | 9.812  | 0.261  | -1.770 | O |
| ATOM | 251 | H GLY A 13   | 6.001  | 0.411  | 0.166  | H |
| ATOM | 252 | H01 GLY A 13 | 7.732  | 1.574  | -1.260 | H |
| ATOM | 253 | N LYS A 14   | 8.961  | -1.268 | -0.284 | N |
| ATOM | 254 | CA LYS A 14  | 10.156 | -2.083 | -0.375 | C |
| ATOM | 255 | C LYS A 14   | 9.744  | -3.543 | -0.215 | C |
| ATOM | 256 | O LYS A 14   | 8.587  | -3.890 | 0.045  | O |
| ATOM | 257 | CB LYS A 14  | 11.163 | -1.756 | 0.773  | C |
| ATOM | 258 | CG LYS A 14  | 11.243 | -0.248 | 1.030  | C |
| ATOM | 259 | CD LYS A 14  | 12.088 | 0.067  | 2.280  | C |
| ATOM | 260 | CE LYS A 14  | 11.833 | 1.522  | 2.669  | C |
| ATOM | 261 | NZ LYS A 14  | 12.612 | 1.862  | 3.967  | N |
| ATOM | 262 | H LYS A 14   | 8.157  | -1.664 | 0.185  | H |

|         |     |     |     |     |    |        |         |        |   |
|---------|-----|-----|-----|-----|----|--------|---------|--------|---|
| ATOM    | 263 | H01 | LYS | A   | 14 | 12.309 | 1.237   | 4.730  | H |
| ATOM    | 264 | H02 | LYS | A   | 14 | 10.623 | -1.887  | -1.344 | H |
| ATOM    | 265 | H03 | LYS | A   | 14 | 12.155 | -2.137  | 0.502  | H |
| ATOM    | 266 | H04 | LYS | A   | 14 | 10.231 | 0.128   | 1.200  | H |
| ATOM    | 267 | H05 | LYS | A   | 14 | 13.153 | -0.108  | 2.085  | H |
| ATOM    | 268 | H06 | LYS | A   | 14 | 10.770 | 1.693   | 2.858  | H |
| ATOM    | 269 | H07 | LYS | A   | 14 | 12.462 | 2.839   | 4.258  | H |
| ATOM    | 270 | H08 | LYS | A   | 14 | 10.844 | -2.286  | 1.676  | H |
| ATOM    | 271 | H09 | LYS | A   | 14 | 11.641 | 0.262   | 0.147  | H |
| ATOM    | 272 | H10 | LYS | A   | 14 | 11.767 | -0.594  | 3.095  | H |
| ATOM    | 273 | H11 | LYS | A   | 14 | 12.197 | 2.214   | 1.906  | H |
| ATOM    | 274 | H12 | LYS | A   | 14 | 13.623 | 1.715   | 3.817  | H |
| ATOM    | 275 | N   | LYS | A   | 15 | 10.776 | -4.444  | -0.292 | N |
| ATOM    | 276 | CA  | LYS | A   | 15 | 10.593 | -5.758  | 0.302  | C |
| ATOM    | 277 | O   | LYS | A   | 15 | 10.542 | -4.558  | 2.454  | O |
| ATOM    | 278 | CB  | LYS | A   | 15 | 11.766 | -6.708  | 0.000  | C |
| ATOM    | 279 | CG  | LYS | A   | 15 | 11.887 | -7.091  | -1.486 | C |
| ATOM    | 280 | CD  | LYS | A   | 15 | 13.036 | -8.113  | -1.671 | C |
| ATOM    | 281 | CE  | LYS | A   | 15 | 13.146 | -8.556  | -3.133 | C |
| ATOM    | 282 | NZ  | LYS | A   | 15 | 14.274 | -9.606  | -3.296 | N |
| ATOM    | 283 | H   | LYS | A   | 15 | 11.723 | -4.107  | -0.407 | H |
| ATOM    | 284 | H01 | LYS | A   | 15 | 15.181 | -9.210  | -3.002 | H |
| ATOM    | 285 | H02 | LYS | A   | 15 | 9.653  | -6.186  | -0.056 | H |
| ATOM    | 286 | H04 | LYS | A   | 15 | 11.605 | -7.607  | 0.600  | H |
| ATOM    | 287 | H05 | LYS | A   | 15 | 12.073 | -6.198  | -2.093 | H |
| ATOM    | 288 | H06 | LYS | A   | 15 | 12.836 | -8.983  | -1.033 | H |
| ATOM    | 289 | H07 | LYS | A   | 15 | 13.404 | -7.727  | -3.794 | H |
| ATOM    | 290 | H08 | LYS | A   | 15 | 14.357 | -9.913  | -4.279 | H |
| ATOM    | 291 | H09 | LYS | A   | 15 | 12.700 | -6.245  | 0.344  | H |
| ATOM    | 292 | H10 | LYS | A   | 15 | 10.942 | -7.535  | -1.820 | H |
| ATOM    | 293 | H11 | LYS | A   | 15 | 13.979 | -7.658  | -1.345 | H |
| ATOM    | 294 | H12 | LYS | A   | 15 | 12.231 | -9.039  | -3.480 | H |
| ATOM    | 295 | H13 | LYS | A   | 15 | 14.080 | -10.435 | -2.712 | H |
| TER     | 296 |     | LYS | A   | 15 |        |         |        |   |
| HETATM  | 297 | C   |     |     | 0  | 10.469 | -5.598  | 1.820  | C |
| HETATM  | 298 | N   |     |     | 0  | 7.826  | 0.711   | -0.738 | N |
| HETATM  | 299 | O   |     |     | 0  | 10.264 | -6.820  | 2.381  | O |
| HETATM  | 300 | H   |     |     | 0  | 10.186 | -6.756  | 3.364  | H |
| END     |     |     |     |     |    |        |         |        |   |
| CONNECT | 248 | 298 |     |     |    |        |         |        |   |
| CONNECT | 249 | 298 |     |     |    |        |         |        |   |
| CONNECT | 252 | 298 |     |     |    |        |         |        |   |
| CONNECT | 276 | 297 |     |     |    |        |         |        |   |
| CONNECT | 277 | 297 |     |     |    |        |         |        |   |
| CONNECT | 297 | 276 | 277 | 299 |    |        |         |        |   |
| CONNECT | 298 | 252 | 248 | 249 |    |        |         |        |   |
| CONNECT | 299 | 297 | 300 |     |    |        |         |        |   |
| CONNECT | 300 | 299 |     |     |    |        |         |        |   |

# **TITLE Trp56GlyPen**

REMARK Created by GaussView 6.1.1: E = -6666.7260931 a.u.

|      |    |     |     |   |   |         |        |        |   |
|------|----|-----|-----|---|---|---------|--------|--------|---|
| ATOM | 1  | N   | ARG | A | 1 | -9.850  | -1.035 | -2.673 | N |
| ATOM | 2  | CA  | ARG | A | 1 | -10.572 | -0.635 | -1.422 | C |
| ATOM | 3  | C   | ARG | A | 1 | -9.429  | -0.604 | -0.399 | C |
| ATOM | 4  | O   | ARG | A | 1 | -8.857  | 0.456  | -0.070 | O |
| ATOM | 5  | CB  | ARG | A | 1 | -11.757 | -1.577 | -1.149 | C |
| ATOM | 6  | CG  | ARG | A | 1 | -12.650 | -1.201 | 0.052  | C |
| ATOM | 7  | CD  | ARG | A | 1 | -13.893 | -2.118 | 0.060  | C |
| ATOM | 8  | NE  | ARG | A | 1 | -14.815 | -1.775 | 1.162  | N |
| ATOM | 9  | CZ  | ARG | A | 1 | -16.114 | -2.123 | 1.182  | C |
| ATOM | 10 | NH1 | ARG | A | 1 | -16.929 | -1.605 | 2.105  | N |
| ATOM | 11 | NH2 | ARG | A | 1 | -16.595 | -2.978 | 0.277  | N |
| ATOM | 12 | H   | ARG | A | 1 | -10.030 | -0.405 | -3.455 | H |
| ATOM | 13 | H01 | ARG | A | 1 | -17.594 | -3.115 | 0.161  | H |
| ATOM | 14 | H02 | ARG | A | 1 | -10.051 | -1.998 | -2.951 | H |

|      |    |           |   |         |        |        |   |
|------|----|-----------|---|---------|--------|--------|---|
| ATOM | 15 | H03 ARG A | 1 | -10.922 | 0.393  | -1.527 | H |
| ATOM | 16 | H04 ARG A | 1 | -11.401 | -2.608 | -1.026 | H |
| ATOM | 17 | H05 ARG A | 1 | -12.976 | -0.159 | -0.038 | H |
| ATOM | 18 | H06 ARG A | 1 | -13.574 | -3.164 | 0.147  | H |
| ATOM | 19 | H07 ARG A | 1 | -14.426 | -1.314 | 1.977  | H |
| ATOM | 20 | H08 ARG A | 1 | -16.660 | -0.813 | 2.676  | H |
| ATOM | 21 | H09 ARG A | 1 | -15.993 | -3.566 | -0.285 | H |
| ATOM | 22 | H10 ARG A | 1 | -12.371 | -1.566 | -2.058 | H |
| ATOM | 23 | H11 ARG A | 1 | -12.089 | -1.316 | 0.987  | H |
| ATOM | 24 | H12 ARG A | 1 | -14.432 | -1.987 | -0.884 | H |
| ATOM | 25 | H13 ARG A | 1 | -17.858 | -1.980 | 2.261  | H |
| ATOM | 26 | N GLN A   | 2 | -8.935  | -1.830 | -0.092 | N |
| ATOM | 27 | CA GLN A  | 2 | -7.587  | -1.989 | 0.438  | C |
| ATOM | 28 | C GLN A   | 2 | -6.529  | -1.503 | -0.556 | C |
| ATOM | 29 | O GLN A   | 2 | -5.327  | -1.473 | -0.176 | O |
| ATOM | 30 | CB GLN A  | 2 | -7.272  | -3.438 | 0.818  | C |
| ATOM | 31 | CG GLN A  | 2 | -8.064  | -3.978 | 2.016  | C |
| ATOM | 32 | CD GLN A  | 2 | -7.170  | -4.991 | 2.758  | C |
| ATOM | 33 | NE2 GLN A | 2 | -7.818  | -5.962 | 3.429  | N |
| ATOM | 34 | OE1 GLN A | 2 | -5.934  | -4.866 | 2.745  | O |
| ATOM | 35 | H GLN A   | 2 | -9.410  | -2.668 | -0.401 | H |
| ATOM | 36 | H01 GLN A | 2 | -8.822  | -6.068 | 3.415  | H |
| ATOM | 37 | H02 GLN A | 2 | -7.471  | -1.352 | 1.322  | H |
| ATOM | 38 | H03 GLN A | 2 | -6.218  | -3.481 | 1.105  | H |
| ATOM | 39 | H04 GLN A | 2 | -9.015  | -4.431 | 1.725  | H |
| ATOM | 40 | H05 GLN A | 2 | -7.278  | -6.631 | 3.965  | H |
| ATOM | 41 | H06 GLN A | 2 | -7.400  | -4.087 | -0.056 | H |
| ATOM | 42 | H07 GLN A | 2 | -8.270  | -3.166 | 2.726  | H |
| ATOM | 43 | N ILE A   | 3 | -6.909  | -1.040 | -1.752 | N |
| ATOM | 44 | CA ILE A  | 3 | -5.905  | -0.348 | -2.563 | C |
| ATOM | 45 | C ILE A   | 3 | -5.241  | 0.759  | -1.751 | C |
| ATOM | 46 | O ILE A   | 3 | -4.075  | 1.115  | -2.006 | O |
| ATOM | 47 | CB ILE A  | 3 | -6.513  | 0.248  | -3.855 | C |
| ATOM | 48 | CG1 ILE A | 3 | -7.557  | 1.344  | -3.528 | C |
| ATOM | 49 | CG2 ILE A | 3 | -7.062  | -0.882 | -4.746 | C |
| ATOM | 50 | CD ILE A  | 3 | -8.318  | 1.839  | -4.770 | C |
| ATOM | 51 | H ILE A   | 3 | -7.882  | -1.102 | -2.098 | H |
| ATOM | 52 | H01 ILE A | 3 | -8.953  | 2.693  | -4.518 | H |
| ATOM | 53 | H02 ILE A | 3 | -5.101  | -1.038 | -2.836 | H |
| ATOM | 54 | H03 ILE A | 3 | -5.676  | 0.722  | -4.381 | H |
| ATOM | 55 | H04 ILE A | 3 | -7.037  | 2.194  | -3.072 | H |
| ATOM | 56 | H05 ILE A | 3 | -6.309  | -1.664 | -4.881 | H |
| ATOM | 57 | H06 ILE A | 3 | -8.955  | 1.057  | -5.193 | H |
| ATOM | 58 | H07 ILE A | 3 | -8.263  | 0.967  | -2.781 | H |
| ATOM | 59 | H08 ILE A | 3 | -7.321  | -0.498 | -5.736 | H |
| ATOM | 60 | H09 ILE A | 3 | -7.621  | 2.159  | -5.552 | H |
| ATOM | 61 | H10 ILE A | 3 | -7.955  | -1.331 | -4.305 | H |
| ATOM | 62 | N LYS A   | 4 | -5.974  | 1.363  | -0.783 | N |
| ATOM | 63 | CA LYS A  | 4 | -5.327  | 2.429  | -0.023 | C |
| ATOM | 64 | C LYS A   | 4 | -4.176  | 1.879  | 0.836  | C |
| ATOM | 65 | O LYS A   | 4 | -3.163  | 2.576  | 1.087  | O |
| ATOM | 66 | CB LYS A  | 4 | -6.342  | 3.169  | 0.865  | C |
| ATOM | 67 | CG LYS A  | 4 | -7.455  | 3.851  | 0.031  | C |
| ATOM | 68 | CD LYS A  | 4 | -8.101  | 5.016  | 0.823  | C |
| ATOM | 69 | CE LYS A  | 4 | -9.133  | 5.747  | -0.044 | C |
| ATOM | 70 | NZ LYS A  | 4 | -9.692  | 6.990  | 0.692  | N |
| ATOM | 71 | H LYS A   | 4 | -6.935  | 1.077  | -0.576 | H |
| ATOM | 72 | H01 LYS A | 4 | -8.931  | 7.654  | 0.911  | H |
| ATOM | 73 | H02 LYS A | 4 | -4.862  | 3.136  | -0.716 | H |
| ATOM | 74 | H03 LYS A | 4 | -5.779  | 3.922  | 1.427  | H |
| ATOM | 75 | H04 LYS A | 4 | -8.212  | 3.107  | -0.241 | H |
| ATOM | 76 | H05 LYS A | 4 | -7.310  | 5.716  | 1.119  | H |
| ATOM | 77 | H06 LYS A | 4 | -9.994  | 5.117  | -0.276 | H |
| ATOM | 78 | H07 LYS A | 4 | -10.146 | 6.719  | 1.579  | H |
| ATOM | 79 | H08 LYS A | 4 | -6.782  | 2.466  | 1.580  | H |
| ATOM | 80 | H09 LYS A | 4 | -7.016  | 4.250  | -0.892 | H |

|      |     |     |     |   |   |         |        |        |   |
|------|-----|-----|-----|---|---|---------|--------|--------|---|
| ATOM | 81  | H10 | LYS | A | 4 | -8.576  | 4.625  | 1.731  | H |
| ATOM | 82  | H11 | LYS | A | 4 | -8.688  | 6.123  | -0.968 | H |
| ATOM | 83  | H12 | LYS | A | 4 | -10.389 | 7.484  | 0.109  | H |
| ATOM | 84  | N   | ILE | A | 5 | -4.355  | 0.643  | 1.319  | N |
| ATOM | 85  | CA  | ILE | A | 5 | -3.276  | -0.031 | 2.040  | C |
| ATOM | 86  | C   | ILE | A | 5 | -2.162  | -0.365 | 1.061  | C |
| ATOM | 87  | O   | ILE | A | 5 | -0.952  | -0.259 | 1.377  | O |
| ATOM | 88  | CB  | ILE | A | 5 | -3.784  | -1.302 | 2.756  | C |
| ATOM | 89  | CG1 | ILE | A | 5 | -4.924  | -0.914 | 3.723  | C |
| ATOM | 90  | CG2 | ILE | A | 5 | -2.609  | -1.957 | 3.503  | C |
| ATOM | 91  | CD  | ILE | A | 5 | -5.457  | -2.115 | 4.524  | C |
| ATOM | 92  | H   | ILE | A | 5 | -5.077  | 0.035  | 0.934  | H |
| ATOM | 93  | H01 | ILE | A | 5 | -5.608  | -2.982 | 3.872  | H |
| ATOM | 94  | H02 | ILE | A | 5 | -2.862  | 0.645  | 2.786  | H |
| ATOM | 95  | H03 | ILE | A | 5 | -4.181  | -1.987 | 1.999  | H |
| ATOM | 96  | H04 | ILE | A | 5 | -5.744  | -0.473 | 3.142  | H |
| ATOM | 97  | H05 | ILE | A | 5 | -2.940  | -2.878 | 3.987  | H |
| ATOM | 98  | H06 | ILE | A | 5 | -6.406  | -1.862 | 5.009  | H |
| ATOM | 99  | H07 | ILE | A | 5 | -4.553  | -0.134 | 4.401  | H |
| ATOM | 100 | H08 | ILE | A | 5 | -2.216  | -1.271 | 4.263  | H |
| ATOM | 101 | H09 | ILE | A | 5 | -4.756  | -2.406 | 5.310  | H |
| ATOM | 102 | H10 | ILE | A | 5 | -1.791  | -2.202 | 2.819  | H |
| ATOM | 103 | N   | TRP | A | 6 | -2.532  | -0.791 | -0.158 | N |
| ATOM | 104 | CA  | TRP | A | 6 | -1.442  | -1.076 | -1.084 | C |
| ATOM | 105 | C   | TRP | A | 6 | -0.658  | 0.206  | -1.366 | C |
| ATOM | 106 | O   | TRP | A | 6 | 0.587   | 0.198  | -1.490 | O |
| ATOM | 107 | CB  | TRP | A | 6 | -1.877  | -1.737 | -2.421 | C |
| ATOM | 108 | CG  | TRP | A | 6 | -0.620  | -2.389 | -2.926 | C |
| ATOM | 109 | CD1 | TRP | A | 6 | 0.424   | -1.770 | -3.559 | C |
| ATOM | 110 | CD2 | TRP | A | 6 | -0.082  | -3.592 | -2.331 | C |
| ATOM | 111 | CE2 | TRP | A | 6 | 1.307   | -3.614 | -2.605 | C |
| ATOM | 112 | CE3 | TRP | A | 6 | -0.651  | -4.624 | -1.570 | C |
| ATOM | 113 | NE1 | TRP | A | 6 | 1.587   | -2.504 | -3.378 | N |
| ATOM | 114 | CZ2 | TRP | A | 6 | 2.148   | -4.587 | -2.062 | C |
| ATOM | 115 | CZ3 | TRP | A | 6 | 0.173   | -5.634 | -1.094 | C |
| ATOM | 116 | CH2 | TRP | A | 6 | 1.566   | -5.598 | -1.315 | C |
| ATOM | 117 | H   | TRP | A | 6 | -3.508  | -0.997 | -0.385 | H |
| ATOM | 118 | H01 | TRP | A | 6 | 2.190   | -6.368 | -0.879 | H |
| ATOM | 119 | H02 | TRP | A | 6 | -0.744  | -1.752 | -0.588 | H |
| ATOM | 120 | H03 | TRP | A | 6 | -2.290  | -0.981 | -3.096 | H |
| ATOM | 121 | H04 | TRP | A | 6 | 0.442   | -0.827 | -4.077 | H |
| ATOM | 122 | H05 | TRP | A | 6 | -1.716  | -4.642 | -1.371 | H |
| ATOM | 123 | H06 | TRP | A | 6 | 2.491   | -2.274 | -3.760 | H |
| ATOM | 124 | H07 | TRP | A | 6 | 3.224   | -4.495 | -2.134 | H |
| ATOM | 125 | H08 | TRP | A | 6 | -0.253  | -6.453 | -0.528 | H |
| ATOM | 126 | H09 | TRP | A | 6 | -2.651  | -2.485 | -2.217 | H |
| ATOM | 127 | N   | PHE | A | 7 | -1.378  | 1.331  | -1.482 | N |
| ATOM | 128 | CA  | PHE | A | 7 | -0.692  | 2.615  | -1.638 | C |
| ATOM | 129 | C   | PHE | A | 7 | 0.329   | 2.788  | -0.507 | C |
| ATOM | 130 | O   | PHE | A | 7 | 1.513   | 3.133  | -0.705 | O |
| ATOM | 131 | CB  | PHE | A | 7 | -1.747  | 3.742  | -1.587 | C |
| ATOM | 132 | CG  | PHE | A | 7 | -1.098  | 5.102  | -1.700 | C |
| ATOM | 133 | CD1 | PHE | A | 7 | -0.913  | 5.704  | -2.946 | C |
| ATOM | 134 | CD2 | PHE | A | 7 | -0.648  | 5.761  | -0.554 | C |
| ATOM | 135 | CE1 | PHE | A | 7 | -0.295  | 6.948  | -3.045 | C |
| ATOM | 136 | CE2 | PHE | A | 7 | -0.025  | 7.002  | -0.650 | C |
| ATOM | 137 | CZ  | PHE | A | 7 | 0.152   | 7.599  | -1.897 | C |
| ATOM | 138 | H   | PHE | A | 7 | -2.403  | 1.301  | -1.528 | H |
| ATOM | 139 | H01 | PHE | A | 7 | 0.615   | 8.575  | -1.971 | H |
| ATOM | 140 | H02 | PHE | A | 7 | -0.125  | 2.659  | -2.572 | H |
| ATOM | 141 | H03 | PHE | A | 7 | -2.296  | 3.649  | -0.645 | H |
| ATOM | 142 | H04 | PHE | A | 7 | -1.276  | 5.207  | -3.840 | H |
| ATOM | 143 | H05 | PHE | A | 7 | -0.797  | 5.299  | 0.417  | H |
| ATOM | 144 | H06 | PHE | A | 7 | -0.183  | 7.423  | -4.012 | H |
| ATOM | 145 | H07 | PHE | A | 7 | 0.305   | 7.513  | 0.246  | H |
| ATOM | 146 | H08 | PHE | A | 7 | -2.453  | 3.579  | -2.409 | H |

|      |     |     |     |   |    |        |        |        |   |
|------|-----|-----|-----|---|----|--------|--------|--------|---|
| ATOM | 147 | N   | GLN | A | 8  | -0.156 | 2.532  | 0.726  | N |
| ATOM | 148 | CA  | GLN | A | 8  | 0.753  | 2.565  | 1.866  | C |
| ATOM | 149 | C   | GLN | A | 8  | 1.980  | 1.683  | 1.584  | C |
| ATOM | 150 | O   | GLN | A | 8  | 3.139  | 2.049  | 1.895  | O |
| ATOM | 151 | CB  | GLN | A | 8  | 0.121  | 1.953  | 3.124  | C |
| ATOM | 152 | CG  | GLN | A | 8  | -1.149 | 2.578  | 3.694  | C |
| ATOM | 153 | CD  | GLN | A | 8  | -1.624 | 1.667  | 4.828  | C |
| ATOM | 154 | NE2 | GLN | A | 8  | -2.824 | 1.969  | 5.357  | N |
| ATOM | 155 | OE1 | GLN | A | 8  | -0.961 | 0.686  | 5.236  | O |
| ATOM | 156 | H   | GLN | A | 8  | -1.138 | 2.291  | 0.860  | H |
| ATOM | 157 | H01 | GLN | A | 8  | -3.347 | 2.784  | 5.068  | H |
| ATOM | 158 | H02 | GLN | A | 8  | 1.123  | 3.578  | 2.045  | H |
| ATOM | 159 | H03 | GLN | A | 8  | 0.881  | 1.995  | 3.903  | H |
| ATOM | 160 | H04 | GLN | A | 8  | -1.937 | 2.654  | 2.935  | H |
| ATOM | 161 | H05 | GLN | A | 8  | -3.162 | 1.432  | 6.148  | H |
| ATOM | 162 | H06 | GLN | A | 8  | -0.104 | 0.912  | 2.895  | H |
| ATOM | 163 | H07 | GLN | A | 8  | -0.962 | 3.581  | 4.096  | H |
| ATOM | 164 | N   | ASN | A | 9  | 1.707  | 0.475  | 1.084  | N |
| ATOM | 165 | CA  | ASN | A | 9  | 2.784  | -0.471 | 0.819  | C |
| ATOM | 166 | C   | ASN | A | 9  | 3.765  | 0.073  | -0.208 | C |
| ATOM | 167 | O   | ASN | A | 9  | 4.998  | -0.102 | -0.073 | O |
| ATOM | 168 | CB  | ASN | A | 9  | 2.206  | -1.812 | 0.366  | C |
| ATOM | 169 | CG  | ASN | A | 9  | 1.414  | -2.422 | 1.512  | C |
| ATOM | 170 | ND2 | ASN | A | 9  | 0.571  | -3.407 | 1.186  | N |
| ATOM | 171 | OD1 | ASN | A | 9  | 1.561  | -2.029 | 2.693  | O |
| ATOM | 172 | H   | ASN | A | 9  | 0.736  | 0.180  | 0.942  | H |
| ATOM | 173 | H01 | ASN | A | 9  | 0.483  | -3.782 | 0.245  | H |
| ATOM | 174 | H02 | ASN | A | 9  | 3.369  | -0.624 | 1.723  | H |
| ATOM | 175 | H03 | ASN | A | 9  | 3.028  | -2.483 | 0.077  | H |
| ATOM | 176 | H04 | ASN | A | 9  | 0.053  | -3.870 | 1.924  | H |
| ATOM | 177 | H05 | ASN | A | 9  | 1.573  | -1.648 | -0.511 | H |
| ATOM | 178 | N   | ARG | A | 10 | 3.244  | 0.773  | -1.225 | N |
| ATOM | 179 | CA  | ARG | A | 10 | 4.167  | 1.459  | -2.121 | C |
| ATOM | 180 | C   | ARG | A | 10 | 5.047  | 2.425  | -1.318 | C |
| ATOM | 181 | O   | ARG | A | 10 | 6.279  | 2.508  | -1.513 | O |
| ATOM | 182 | CB  | ARG | A | 10 | 3.413  | 2.246  | -3.212 | C |
| ATOM | 183 | CG  | ARG | A | 10 | 4.436  | 2.833  | -4.206 | C |
| ATOM | 184 | CD  | ARG | A | 10 | 3.809  | 3.817  | -5.206 | C |
| ATOM | 185 | NE  | ARG | A | 10 | 4.874  | 4.328  | -6.102 | N |
| ATOM | 186 | CZ  | ARG | A | 10 | 4.659  | 4.938  | -7.273 | C |
| ATOM | 187 | NH1 | ARG | A | 10 | 5.679  | 5.180  | -8.103 | N |
| ATOM | 188 | NH2 | ARG | A | 10 | 3.420  | 5.302  | -7.622 | N |
| ATOM | 189 | H   | ARG | A | 10 | 2.227  | 0.833  | -1.351 | H |
| ATOM | 190 | H01 | ARG | A | 10 | 3.208  | 5.615  | -8.562 | H |
| ATOM | 191 | H02 | ARG | A | 10 | 4.863  | 0.746  | -2.572 | H |
| ATOM | 192 | H03 | ARG | A | 10 | 2.811  | 3.018  | -2.721 | H |
| ATOM | 193 | H04 | ARG | A | 10 | 4.904  | 2.014  | -4.764 | H |
| ATOM | 194 | H05 | ARG | A | 10 | 3.339  | 4.647  | -4.665 | H |
| ATOM | 195 | H06 | ARG | A | 10 | 5.829  | 4.222  | -5.779 | H |
| ATOM | 196 | H07 | ARG | A | 10 | 6.593  | 4.766  | -7.961 | H |
| ATOM | 197 | H08 | ARG | A | 10 | 2.665  | 5.318  | -6.951 | H |
| ATOM | 198 | H09 | ARG | A | 10 | 2.731  | 1.564  | -3.732 | H |
| ATOM | 199 | H10 | ARG | A | 10 | 5.228  | 3.342  | -3.645 | H |
| ATOM | 200 | H11 | ARG | A | 10 | 3.057  | 3.304  | -5.815 | H |
| ATOM | 201 | H12 | ARG | A | 10 | 5.578  | 5.785  | -8.909 | H |
| ATOM | 202 | N   | ARG | A | 11 | 4.412  | 3.197  | -0.415 | N |
| ATOM | 203 | CA  | ARG | A | 11 | 5.216  | 4.116  | 0.388  | C |
| ATOM | 204 | C   | ARG | A | 11 | 6.247  | 3.384  | 1.260  | C |
| ATOM | 205 | O   | ARG | A | 11 | 7.310  | 3.941  | 1.619  | O |
| ATOM | 206 | CB  | ARG | A | 11 | 4.297  | 4.967  | 1.293  | C |
| ATOM | 207 | CG  | ARG | A | 11 | 5.079  | 5.921  | 2.218  | C |
| ATOM | 208 | CD  | ARG | A | 11 | 5.934  | 6.929  | 1.427  | C |
| ATOM | 209 | NE  | ARG | A | 11 | 6.814  | 7.730  | 2.295  | N |
| ATOM | 210 | CZ  | ARG | A | 11 | 8.098  | 7.417  | 2.543  | C |
| ATOM | 211 | NH1 | ARG | A | 11 | 8.877  | 8.326  | 3.151  | N |
| ATOM | 212 | NH2 | ARG | A | 11 | 8.595  | 6.238  | 2.183  | N |

|      |     |     |          |        |        |        |   |
|------|-----|-----|----------|--------|--------|--------|---|
| ATOM | 213 | H   | ARG A 11 | 3.396  | 3.153  | -0.296 | H |
| ATOM | 214 | H01 | ARG A 11 | 9.597  | 6.092  | 2.210  | H |
| ATOM | 215 | H02 | ARG A 11 | 5.807  | 4.742  | -0.285 | H |
| ATOM | 216 | H03 | ARG A 11 | 3.711  | 4.262  | 1.890  | H |
| ATOM | 217 | H04 | ARG A 11 | 5.734  | 5.348  | 2.879  | H |
| ATOM | 218 | H05 | ARG A 11 | 5.293  | 7.619  | 0.872  | H |
| ATOM | 219 | H06 | ARG A 11 | 6.421  | 8.551  | 2.738  | H |
| ATOM | 220 | H07 | ARG A 11 | 8.596  | 9.294  | 3.244  | H |
| ATOM | 221 | H08 | ARG A 11 | 8.020  | 5.412  | 1.909  | H |
| ATOM | 222 | H09 | ARG A 11 | 3.610  | 5.533  | 0.654  | H |
| ATOM | 223 | H10 | ARG A 11 | 4.370  | 6.468  | 2.847  | H |
| ATOM | 224 | H11 | ARG A 11 | 6.573  | 6.412  | 0.709  | H |
| ATOM | 225 | H12 | ARG A 11 | 9.792  | 8.084  | 3.508  | H |
| ATOM | 226 | N   | LYS A 12 | 5.912  | 2.146  | 1.644  | N |
| ATOM | 227 | CA  | LYS A 12 | 6.819  | 1.297  | 2.408  | C |
| ATOM | 228 | C   | LYS A 12 | 7.907  | 0.653  | 1.536  | C |
| ATOM | 229 | O   | LYS A 12 | 8.818  | -0.014 | 2.077  | O |
| ATOM | 230 | CB  | LYS A 12 | 6.021  | 0.140  | 3.054  | C |
| ATOM | 231 | CG  | LYS A 12 | 4.976  | 0.641  | 4.067  | C |
| ATOM | 232 | CD  | LYS A 12 | 3.932  | -0.439 | 4.454  | C |
| ATOM | 233 | CE  | LYS A 12 | 2.658  | 0.264  | 4.948  | C |
| ATOM | 234 | NZ  | LYS A 12 | 1.436  | -0.647 | 4.943  | N |
| ATOM | 235 | H   | LYS A 12 | 4.965  | 1.815  | 1.454  | H |
| ATOM | 236 | H01 | LYS A 12 | 0.540  | -0.087 | 5.041  | H |
| ATOM | 237 | H02 | LYS A 12 | 7.326  | 1.896  | 3.170  | H |
| ATOM | 238 | H03 | LYS A 12 | 6.743  | -0.538 | 3.518  | H |
| ATOM | 239 | H04 | LYS A 12 | 4.439  | 1.469  | 3.598  | H |
| ATOM | 240 | H05 | LYS A 12 | 4.327  | -1.124 | 5.211  | H |
| ATOM | 241 | H06 | LYS A 12 | 2.433  | 1.067  | 4.251  | H |
| ATOM | 242 | H07 | LYS A 12 | 1.484  | -1.325 | 5.713  | H |
| ATOM | 243 | H08 | LYS A 12 | 5.533  | -0.391 | 2.229  | H |
| ATOM | 244 | H09 | LYS A 12 | 5.475  | 1.024  | 4.964  | H |
| ATOM | 245 | H10 | LYS A 12 | 3.662  | -1.027 | 3.573  | H |
| ATOM | 246 | H11 | LYS A 12 | 2.771  | 0.678  | 5.952  | H |
| ATOM | 247 | H12 | LYS A 12 | 1.411  | -1.187 | 4.027  | H |
| ATOM | 248 | N   | GLY A 13 | 7.766  | 0.797  | 0.215  | N |
| ATOM | 249 | CA  | GLY A 13 | 8.657  | 0.144  | -0.727 | C |
| ATOM | 250 | C   | GLY A 13 | 8.519  | -1.380 | -0.752 | C |
| ATOM | 251 | O   | GLY A 13 | 9.481  | -2.095 | -1.064 | O |
| ATOM | 252 | H   | GLY A 13 | 7.027  | 1.371  | -0.183 | H |
| ATOM | 253 | H01 | GLY A 13 | 9.704  | 0.341  | -0.488 | H |
| ATOM | 254 | H02 | GLY A 13 | 8.435  | 0.552  | -1.716 | H |
| ATOM | 255 | N   | LYS A 14 | 7.305  | -1.893 | -0.380 | N |
| ATOM | 256 | CA  | LYS A 14 | 7.275  | -3.317 | -0.092 | C |
| ATOM | 257 | C   | LYS A 14 | 6.099  | -4.074 | -0.686 | C |
| ATOM | 258 | O   | LYS A 14 | 4.972  | -3.616 | -0.918 | O |
| ATOM | 259 | CB  | LYS A 14 | 7.324  | -3.552 | 1.448  | C |
| ATOM | 260 | CG  | LYS A 14 | 8.697  | -3.092 | 1.958  | C |
| ATOM | 261 | CD  | LYS A 14 | 8.858  | -3.085 | 3.495  | C |
| ATOM | 262 | CE  | LYS A 14 | 10.067 | -2.189 | 3.782  | C |
| ATOM | 263 | NZ  | LYS A 14 | 10.467 | -2.222 | 5.278  | N |
| ATOM | 264 | H   | LYS A 14 | 6.491  | -1.302 | -0.199 | H |
| ATOM | 265 | H01 | LYS A 14 | 9.684  | -1.906 | 5.868  | H |
| ATOM | 266 | H02 | LYS A 14 | 8.202  | -3.696 | -0.535 | H |
| ATOM | 267 | H03 | LYS A 14 | 7.114  | -4.600 | 1.679  | H |
| ATOM | 268 | H04 | LYS A 14 | 8.846  | -2.064 | 1.623  | H |
| ATOM | 269 | H05 | LYS A 14 | 8.999  | -4.101 | 3.879  | H |
| ATOM | 270 | H06 | LYS A 14 | 9.822  | -1.157 | 3.513  | H |
| ATOM | 271 | H07 | LYS A 14 | 11.279 | -1.609 | 5.451  | H |
| ATOM | 272 | H08 | LYS A 14 | 6.530  | -2.946 | 1.902  | H |
| ATOM | 273 | H09 | LYS A 14 | 9.486  | -3.709 | 1.513  | H |
| ATOM | 274 | H10 | LYS A 14 | 7.961  | -2.652 | 3.955  | H |
| ATOM | 275 | H11 | LYS A 14 | 10.951 | -2.523 | 3.234  | H |
| ATOM | 276 | H12 | LYS A 14 | 10.719 | -3.183 | 5.560  | H |
| ATOM | 277 | N   | LYS A 15 | 6.423  | -5.394 | -0.885 | N |
| ATOM | 278 | CA  | LYS A 15 | 5.413  | -6.427 | -1.014 | C |

|                         |     |     |          |       |         |        |   |
|-------------------------|-----|-----|----------|-------|---------|--------|---|
| ATOM                    | 279 | O   | LYS A 15 | 4.998 | -6.016  | 1.372  | O |
| ATOM                    | 280 | CB  | LYS A 15 | 6.037 | -7.780  | -1.421 | C |
| ATOM                    | 281 | CG  | LYS A 15 | 6.696 | -7.762  | -2.813 | C |
| ATOM                    | 282 | CD  | LYS A 15 | 7.291 | -9.157  | -3.133 | C |
| ATOM                    | 283 | CE  | LYS A 15 | 7.935 | -9.168  | -4.524 | C |
| ATOM                    | 284 | NZ  | LYS A 15 | 8.522 | -10.566 | -4.841 | N |
| ATOM                    | 285 | H   | LYS A 15 | 7.354 | -5.700  | -0.627 | H |
| ATOM                    | 286 | H01 | LYS A 15 | 9.243 | -10.824 | -4.147 | H |
| ATOM                    | 287 | H02 | LYS A 15 | 4.661 | -6.132  | -1.750 | H |
| ATOM                    | 288 | H04 | LYS A 15 | 5.236 | -8.524  | -1.397 | H |
| ATOM                    | 289 | H05 | LYS A 15 | 7.483 | -7.002  | -2.847 | H |
| ATOM                    | 290 | H06 | LYS A 15 | 6.489 | -9.904  | -3.087 | H |
| ATOM                    | 291 | H07 | LYS A 15 | 8.769 | -8.467  | -4.593 | H |
| ATOM                    | 292 | H08 | LYS A 15 | 8.958 | -10.581 | -5.778 | H |
| ATOM                    | 293 | H09 | LYS A 15 | 6.778 | -8.068  | -0.663 | H |
| ATOM                    | 294 | H10 | LYS A 15 | 5.943 | -7.501  | -3.566 | H |
| ATOM                    | 295 | H11 | LYS A 15 | 8.040 | -9.409  | -2.373 | H |
| ATOM                    | 296 | H12 | LYS A 15 | 7.208 | -8.961  | -5.310 | H |
| ATOM                    | 297 | H13 | LYS A 15 | 7.781 | -11.285 | -4.817 | H |
| TER                     | 298 |     | LYS A 15 |       |         |        |   |
| HETATM                  | 299 | C   | 0        | 4.730 | -6.603  | 0.340  | C |
| HETATM                  | 300 | O   | 0        | 3.756 | -7.561  | 0.240  | O |
| HETATM                  | 301 | H   | 0        | 3.341 | -7.737  | 1.121  | H |
| END                     |     |     |          |       |         |        |   |
| CONNECT 278 299         |     |     |          |       |         |        |   |
| CONNECT 279 299         |     |     |          |       |         |        |   |
| CONNECT 299 278 279 300 |     |     |          |       |         |        |   |
| CONNECT 300 299 301     |     |     |          |       |         |        |   |
| CONNECT 301 300         |     |     |          |       |         |        |   |
